# Supplementary material for: Harnessing regioselective aryl migration of pyridone-based aryl-λ3‑iodonium salts to access iodine-substituted aryloxypyridines
Source: Research Square preprint supplement (doi:10.21203/rs.3.rs-7844273/v1), 2025-10-21
Supplement: Supplementary file 1 [file dc51f6a6b0e8e1d0819c179c.docx]

**Supplementary Information**

***for***

**Harnessing Regio****selective** **Aryl Migration of** **Pyridone-Based Aryl-λ3‑****Iodonium Salts to** **Access** **Iodine-Substituted Aryloxypyridines**

Linmei Zhao1, Mengling He1, Wankai Ma2,4, Zequan Xiang1, Huaming Tao1*, Lijuan Song2* & Shaoyu Mai1,3*

1 Guangdong Provincial Key Laboratory of Chinese Medicine Pharmaceutics, School of Traditional Chinese Medicine, Southern Medical University, Guangzhou, 510515, China

2 School of Science, Harbin Institute of Technology (Shenzhen), Shenzhen, 518055, China

3 Guangdong Basic Research Center of Excellence for Integrated Traditional and Western Medicine for Qingzhi Diseases, Guangzhou 510515, China

4 School of Chemical Engineering and Technology,Hebei University of Technology, Tianjin, 300130, China

*Corresponding author:

Huaming Tao, E-mail: taohm@smu.edu.cn

Lijuan Song, E-mail: songlijuan@hit.edu.cn

Shaoyu Mai, E-mail: shaoyumai@smu.edu.cn

**Table of Contents:**

Supplementary Methods

1. Materials and Methods S3

2. Synthesis of Starting Materials S4

3. General Procedure for the Synthesis of Aryloxypyridines/Pyrimidines S9

4. The synthesis of Iodonium Salt **3** S10

5. X-Ray Crystallographic Data S11

6. Synthetic Applications S15

7. Crossover Experiment S27

8. DFT Calculations S28

9. Characterization of Products S54

10. NMR Spectra of Products S72

11. Supplementary References S139

**Supplementary Methods**

1. **Materials and Methods**

Commercial reagents were purchased from Bide, Leyan.com, Adamas, Aldrich, TCI, Aladdin, and Energy Chemical and were used as received. All solvents used, mainly petroleum ether (PE), ethyl acetate (EtOAc), dichloromethane (DCM) and methanol (MeOH) were used directly as received. Anhydrous tetrahydrofuran (THF) and CH3CN were dried by filtration through alumina according to the procedure of Grubbs. All reactions were carried out under air atmosphere unless specified. Analytical thin layer chromatography was performed on 0.25 mm extra hard silica gel plates with UV 254 fluorescent indicator. 1H NMR and 13C NMR spectra were recorded at ambient temperature using 400 MHz, 500 MHz or 600 MHz spectrometers. 1H and 13C NMR chemical shifts were determined relative to internal standard TMS at 0.0, (CDCl3: *δ* H = 7.26 and *δ* C =77.16 ppm; DMSO-*d6*: *δ* H = 2.50 ppm, *δ* C = 39.52 ppm; Methanol-*d4*: *δ* H = 3.31, 4.87 ppm, *δ* C= 49.00 ppm). The data are reported as follows: chemical shift in ppm from internal tetramethylsilane on the *δ* scale, multiplicity (br = broad, s = singlet, d = doublet, t = triplet, q = quartet, m = multiplet), coupling constants (Hz) and integrations. High-resolution mass spectra (HRMS) were recorded on an Agilent 6545B series Q-TOF LCMS with electronspray ionization (ESI).

**2. Synthesis of Starting Materials**

**Experimental Procedures and Characterization Data for substituted pyridones**

General procedure for substituted pyridones **P1**-**P3**[1]

4-Chloropyridin-2(1*H*)-one(260 mg, 2 mmol, 1.0 equiv.) and amine (4 mmol, 2 equiv.) were added into a Schlenk tub, and the reaction mixture was stirred at 150 oC for 3 h. After the reaction completed, the reaction mixture was cooled to room temperature. Subsequently, ice water was added to the reaction mixture, resulting in the precipitation of a large amount of solid. The obtained solid was purified by column chromatography on silica gel (DCM/MeOH: 30/1, v/v) to give the expected product **P1-P3**.

**4-((4-Methylphenethyl)amino)pyridin-2(1*H*)-one (****P1)**

White solid (410 mg, 90%); **1H NMR (400 MHz, Chloroform-*d*)** δ 11.83 (s, 1H), 7.14 – 7.06 (m, 5H), 5.64 (dd, *J* = 7.1, 2.2 Hz, 1H), 5.58 (d, *J* = 2.2 Hz, 1H), 4.45 (s, 1H), 3.36 (q, *J* = 6.4 Hz, 2H), 2.87 (t, *J* = 6.9 Hz, 2H), 2.33 (s, 3H); **13C NMR (125 MHz, DMSO-*d*6)** δ 163.7, 156.5, 136.3, 135.1, 133.8, 128.9, 128.6, 98.0, 90.2, 43.5, 33.7, 20.6. **HRMS (ESI) m/z:** calcd.for C14H17N2O+ [M + H]+: 229.1336; Found: 229.1332.

**4-((4-Methoxybenzyl)amino)pyridin-2(1*H*)-one (P2)**

White solid (451 mg, 98%);**1H NMR (500 MHz, DMSO-*d*6)** δ 10.35 (s, 1H), 7.25 – 7.21 (m, 2H), 7.00 (t, *J* = 5.8 Hz, 1H), 6.96 (d, *J* = 7.3 Hz, 1H), 6.92 – 6.88 (m, 2H), 5.71 (dd, *J* = 7.3, 2.3 Hz, 1H), 5.03 (s, 1H), 4.13 (d, *J* = 5.7 Hz, 2H), 3.73 (s, 3H); **13C NMR (125 MHz, DMSO-*d*6)** δ 164.1, 158.8, 156.9, 134.3, 131.1, 130.1, 128.9, 114.3, 98.6, 91.4, 55.5, 45.3. **HRMS (ESI) m/z:** calcd.for C13H15N2O2+ [M + H]+: 231.1128; Found: 231.1123.

**(*S*)-4-((1-phenylethyl)amino)pyridin-2(1*H*)-one (P3)**

White solid (377 mg, 88%); **1H NMR (400 MHz, Chloroform-*d*)** δ 12.18 (s, 1H), 7.35 – 7.16 (m, 6H), 7.00 (d, *J* = 7.1 Hz, 1H), 5.66 (dd, *J* = 6.9, 2.3 Hz, 1H), 5.36 (s, 1H), 4.81 (d, *J* = 5.9 Hz, 1H), 4.46 (p, *J* = 6.4 Hz, 1H), 1.49 (d, *J* = 6.7 Hz, 3H); **13C NMR (100 MHz, Chloroform-*d*))** δ 164.3, 157.7, 143.4, 96.7, 87.9, 63.8, 49.7, 45.4, 41.4, 18.5, 18.0. **HRMS (ESI) m/z:** calcd.for C13H15N2O+ [M + H]+: 215.1179; Found: 215.1176.

General procedure B for substituted pyridones **P4**-**P7**[2]

Ethyl 4-chloro-6-methyl-2-oxo-1,2-dihydropyridine-3-carboxylate(431 mg, 2 mmol, 1.0 equiv.), amines (2.2 mmol, 1.1 equiv.) were added into a Schlenk tube in EtOH (2.5 mL), the reaction mixture was stirred at 80 oC for 48 h. After the reaction completed, the solvent was cooled to room temperature. Subsequently, HCl (0.5 mL) was added to above reaction mixture. The resulting reaction mixture was stirred at 100 oC for 36 h. After the reaction completed, the resulting solvent was diluted with DCM (10 mL) and then washed with saturated aqueous solution of sodium bicarbonate, H2O, and brine, respectively. Finally, the combined organic phase was evaporated and dried, and then purified by column chromatography on silica gel (DCM/MeOH: 30/1, v/v) to give the expected product **P4**-**P7**.

**6-Methyl-4-(((3-methyloxetan-3-yl)methyl)amino)pyridin-2(1*H*)-one (P4)**

Colorless oil (325 mg, 78%); **1H NMR (600 MHz, DMSO-*d*6)** δ 10.45 (s, 1H), 6.18 (t, *J* = 6.0 Hz, 1H), 5.04 (d, *J* = 2.2 Hz, 1H), 4.83 (d, *J* = 5.2 Hz, 1H), 3.59 (q, *J* = 10.8 Hz, 2H), 3.30 (s, 2H), 2.95 (d, *J* = 6.0 Hz, 2H), 2.00 (s, 3H), 0.90 (s, 3H); **13C NMR (150 MHz, DMSO-*d*6)** δ 164.3, 157.7, 143.4, 96.7, 87.9, 63.8, 49.7, 45.4, 41.4, 18.5, 18.0. **HRMS (ESI) m/z:** calcd.for C11H17N2O2+ [M + H]+: 209.1285; Found:209.1282.

**4-((Adamantan-1-ylmethyl)amino)-6-methylpyridin-2(1*H*)-one (P5)**

White solid (440 mg, 81%); **1H NMR (500 MHz, DMSO-d6)** δ 10.23 (s, 1H), 6.19 (t, *J* = 6.0 Hz, 1H), 5.54 (s, 1H), 4.95 (s, 1H), 2.64 (d, *J* = 6.0 Hz, 2H), 1.98 (s, 3H), 1.93 (s, 3H), 1.70 – 1.55 (m, 6H), 1.49 (s, 6H); **13C NMR (125 MHz, DMSO-*d*6)** δ 164.2, 157.8, 143.1, 87.6, 53.7, 36.5, 34.1, 27.7, 18.5. **HRMS (ESI) m/z:** calcd.for C17H25N2O+ [M + H]+: 273.1962; Found: 273.1959.

**4-((((1R,4aS,10aR)-7-isopropyl-1,4a-dimethyl-1,2,3,4,4a,9,10,10a-octahydrophenanthren-1-yl)methyl)amino)-6-methylpyridin-2(1*H*)-one (P6)**

White solid (530 mg, 68%); **1H NMR (600 MHz, Chloroform-*d*)** δ 12.40 (s, 1H), 7.17 (d, *J* = 8.2 Hz, 1H), 7.00 (dd, *J* = 8.2, 2.0 Hz, 1H), 6.89 (s, 1H), 5.44 – 5.39 (m, 2H), 4.18 (t, *J* = 6.2 Hz, 1H), 2.99 (dd, *J* = 13.2, 5.5 Hz, 1H), 2.95 – 2.89 (m, 2H), 2.85 – 2.78 (m, 2H), 2.32 – 2.27 (m, 1H), 2.20 (s, 3H), 1.79 – 1.73 (m, 3H), 1.67 (dt, *J* = 14.0, 3.7 Hz, 1H), 1.52 – 1.44 (m, 2H), 1.41 – 1.30 (m, 2H), 1.23 (s, 3H), 1.22 (s, 6H), 0.97 (s, 3H); **13C NMR (150 MHz, Chloroform-*d*)** δ 166.9, 158.0, 147.2, 145.9, 144.9, 134.7, 127.0, 124.3, 124.1, 98.2, 89.5, 53.4, 45.6, 38.4, 37.7, 37.6, 36.4, 33.5, 30.1, 25.3, 24.1, 24.1, 19.1, 19.0, 18.7. **HRMS (ESI) m/z:** calcd.for C26H37N2O+ [M + H]+: 393.2901; Found: 393.2896.

**6-Methyl-4-(pentan-3-ylamino)pyridin-2(1*H*)-one (P7)**

White solid (365 mg, 94%); **1H NMR (400 MHz, Chloroform-*d*)** δ 12.08 (s, 1H), 5.39 (s, 1H), 5.36 (d, *J* = 2.1 Hz, 1H), 3.91 (d, *J* = 8.5 Hz, 1H), 3.19 (h, *J* = 6.2 Hz, 1H), 2.21 (s, 3H), 1.65 – 1.51 (m, 2H), 1.43 (dp, *J* = 14.3, 7.2 Hz, 2H), 0.89 (t, *J* = 7.4 Hz, 6H); **13C NMR (100 MHz, Chloroform-*d*)** δ 166.9, 157.4, 144.8, 98.2, 89.6, 55.1, 27.0, 19.1, 10.3. **HRMS (ESI) m/z:** calcd.for C11H19N2O+ [M + H]+: 195.1492; Found: 195.1491.

**Supplementary Figure 1.** Preparation of substituted Koser’s reagent

General procedure for the synthesis of Koser’s reagent [3,4]：

In a round bottom flask fitted with a magnetic stirrer, a solution of iodoarene (2.0 mmol) in DCM/TFE (1/1 = v/v, 20 mL) was added *m*CPBA (2.0 mmol), followed by TsOH·H2O (2.0 mmol). The resulting solution was stirred at room temperature for 1 h and concentrated under a stream of air, then diethyl ether (20 mL) was added to the remaining residue. The resulting precipitate was filtered off and dried in vacuo to give compound **2b**-**2r**, as a solid.

**(4-Cyano-2,6-dimethylphenyl)(hydroxy)-λ3-iodaneyl-4 methylbenzenesulfonate (2q)**

White solid (739 mg, 83%); **1H NMR (400 MHz, Methanol-*d*4)** δ 7.77 (s, 2H), 7.56 – 7.51 (m, 2H), 7.19 (d, *J* = 8.0 Hz, 2H), 2.80 (s, 6H), 2.37 (s, 3H); **13C NMR (150 MHz, Methanol-*d*4)** δ 145.3, 142.3, 142.2, 132.7, 130.5, 129.9, 126.8, 118.8, 118.0, 29.7, 26.6, 21.3. **HRMS (ESI) m/z:** calcd.for C9H9INO+ [M-OTs]+: 273.9724; Found: 289.0347

**(2-Fluoro-4-nitrophenyl)(hydroxy)-l3-iodanyl 4-methylbenzenesulfonate (2r)**

White solid (800 mg, 88%); **1H NMR (500 MHz, DMSO-*d*6)** δ 8.64 (dd, *J* = 5.4, 2.8 Hz, 1H), 8.30 (ddd, *J* = 9.0, 4.4, 2.8 Hz, 1H), 7.53 (dd, *J* = 9.1, 7.4 Hz, 1H), 7.49 (d, *J* = 8.1 Hz, 2H), 7.13 (d, *J* = 7.8 Hz, 2H), 2.29 (s, 3H); **13C NMR (125 MHz, DMSO-*d*6)** δ 166.5, 164.5, 145.1 (d, *J* = 3.1 Hz), 135.1 (d, *J* = 4.5 Hz), 128.6, 126.8 (d, *J* = 9.9 Hz), 126.0, 117.1, 116.9, 84.0, 83.8, 21.3. **HRMS (ESI) m/z:** calcd.For C6H4FINO3+ [M - OTs]+: 283.9215; Found: 283.9187.

**3. General Procedure for Aryloxypyridines/Pyrimidines (5-46)**

Pyridones/pyrimidines (0.2 mmol, 1.0 equiv.), Koser’s reagent (0.22 mmol, 1.1 equiv.) were added into a Schlenk tube in EtOH (1 mL), and the reaction mixture was stirred at 0 oC for 1 h. After the reaction completed, the solvent was removed under vacuum condition. Subsequently, K2CO3 (0.2 mmol, 28 mg, 1.0 equiv.) and **IL-5** ([Bmim][OTf], 1 mL) were added to above reaction mixture. The resulting reaction mixture was stirred at 90 oC for 5.5 h. After the reaction completed, the resulting solvent was diluted with H2O and extracted with EA (3 times). Finally, the combined organic phase was evaporated and dried, and then purified by column chromatography on silica gel (PE/DCM/EA: 4/1/1, v/v/v) to give the expected product **5**-**46**.

**4. The synthesis of Iodonium Salt 3**

In a round bottom flask fitted with a magnetic stirrer, a solution of 4-aminopyridin-2(1*H*)-one **1a** (20 mmol, 2.20 g, 1.0 equiv.), **2a** (22 mmol, 8.84 g, 1.1 equiv.) in EtOH (100 mL) was added. The resulting solution was stirred at 0 oC for 3 h. The precipitate was dilute with EA (150 mL), filtered, washed with Et2O, and dried in vacuum. The pyridone-based aryl-λ3‑iodonium salt **3** was obtained as white solid (9.09 g, 94% yield).

**(4-Amino-2-oxo-1,2-dihydropyridin-3-yl)(phenyl)iodonium 4-methylbenzenesulfonate (3)**

White solid (9090 mg, 94%); **1H NMR (600 MHz, Methanol-*d*4)** δ 8.05 (dd, *J* = 8.4, 1.2 Hz, 2H), 7.69 (d, *J* = 8.2 Hz, 2H), 7.62 (t, *J* = 7.5 Hz, 1H), 7.46 (t, *J* = 7.9 Hz, 2H), 7.26 (d, *J* = 7.2 Hz, 1H), 7.22 (d, *J* = 7.9 Hz, 2H), 6.02 (d, *J* = 7.3 Hz, 1H), 4.70 (s, 2H), 2.35 (s, 3H); **13C NMR (100 MHz, Methanol-*d*4)** δ 162.6, 162.4, 143.6, 141.6, 139.6, 135.7, 133.2, 132.6, 129.8, 127.0, 115.7, 99.6, 86.7, 21.3. **HRMS (ESI) m/z:** calcd.for C18H17IN2O4S+ [M + H]+: 485.0027; Found: 485.0023.

**5. X-Ray Crystallographic Data**

Solvent system for crystal growth- 1:1 (DCM/Hexane); ~5 – 7 mg compound (**3**, **4**, **5**, or **21**) was dissolved in DCM followed by dropwise addition of hexane through the walls of the vial. A perforated cap was placed on the vial. Crystals were observed after 2-3 days.


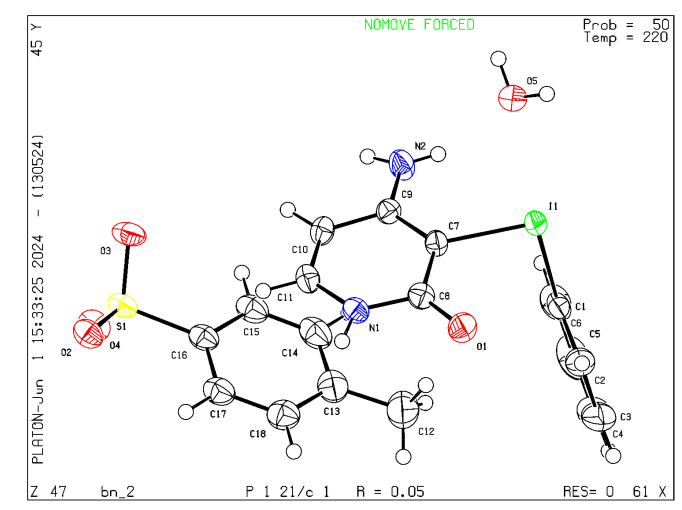


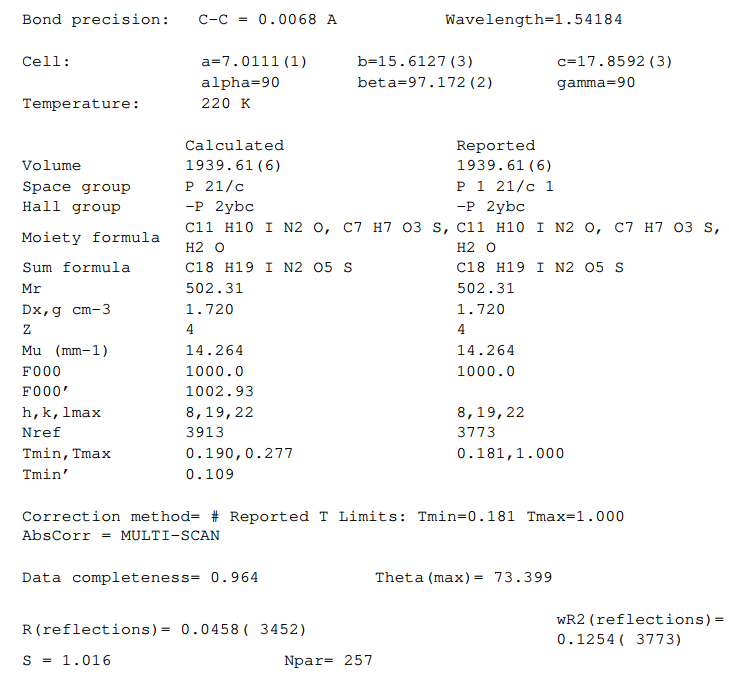


**Supplementary Figure 2.** Crystallographic data of compound **3**


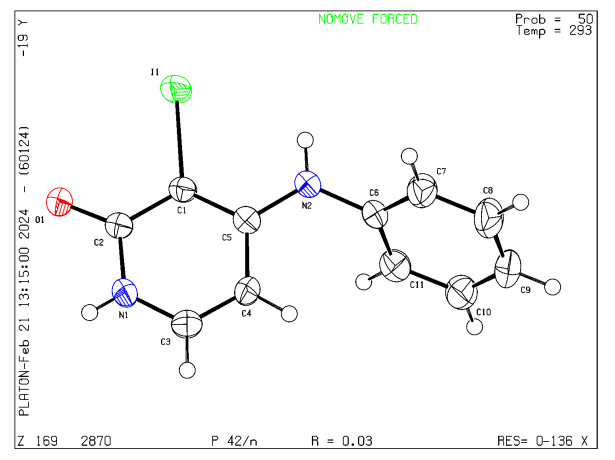


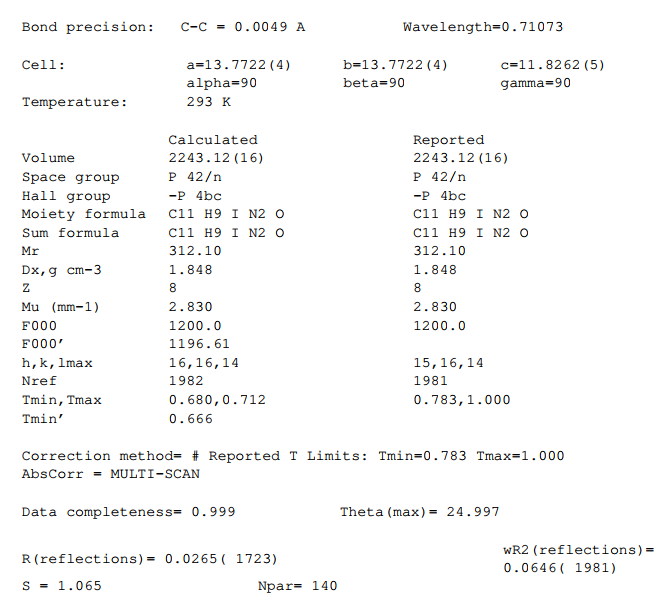


**Supplementary Figure 3.** Crystallographic data of compound **4**


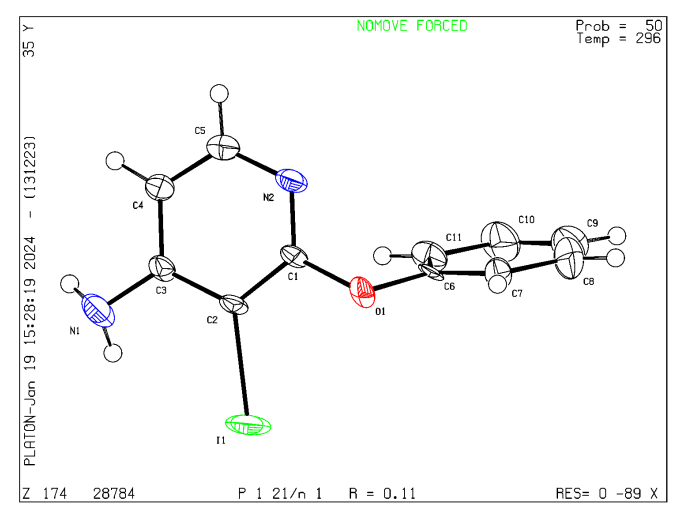


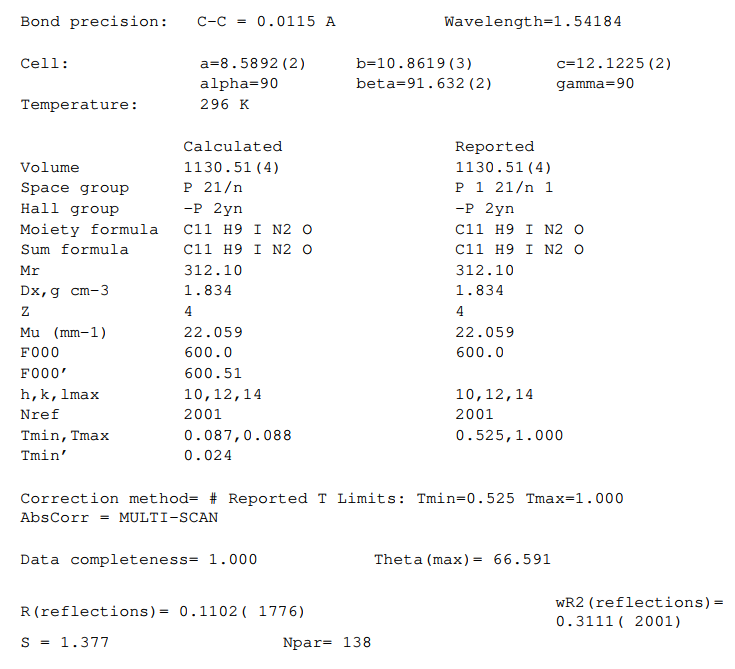


**Supplementary Figure 4.** Crystallographic data of compound **5**


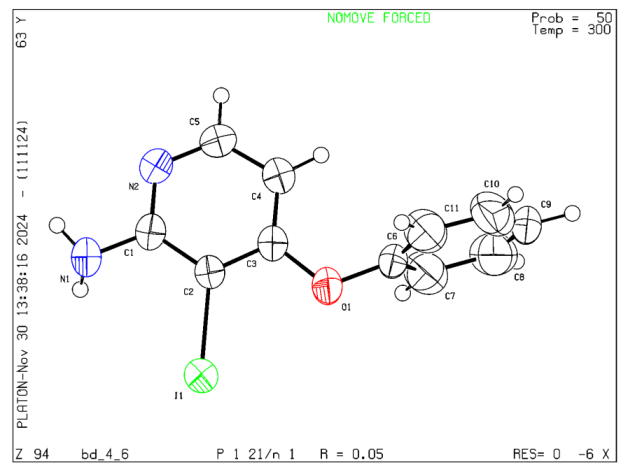


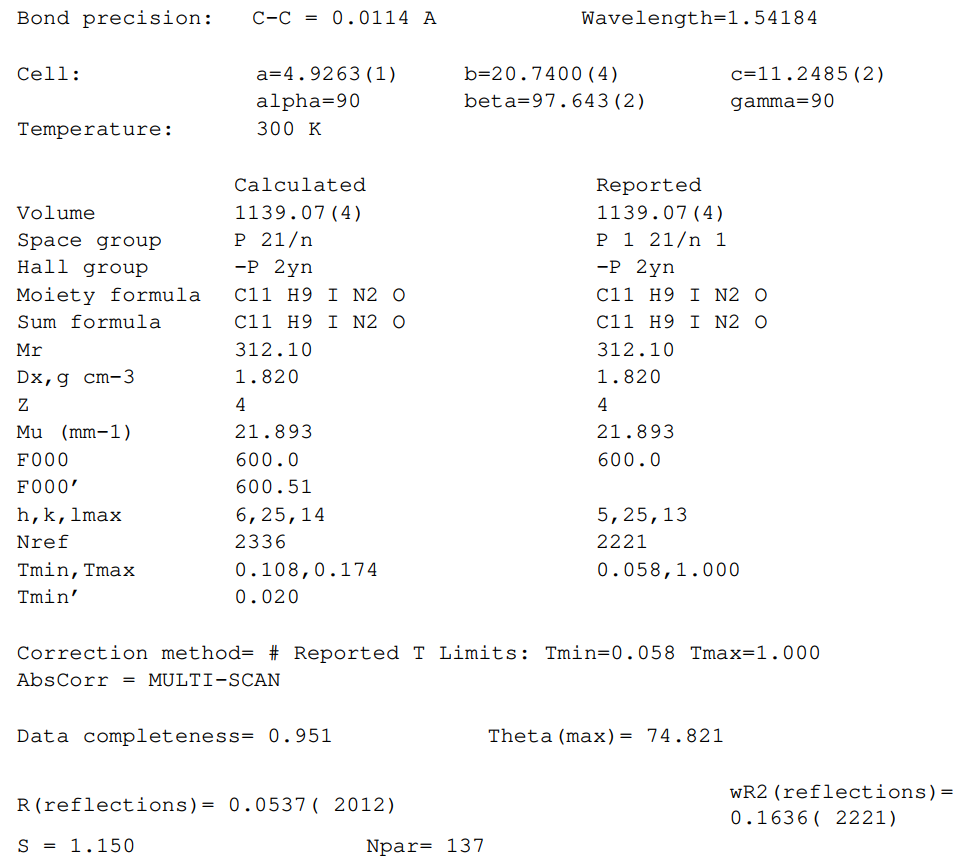


**Supplementary Figure 5.** Crystallographic data of compound **21**

**6. Synthetic Applications**

(1) 10 mmol-scale synthesis of **5**：

**Step 1**: In a round bottom flask fitted with a magnetic stirrer, a solution of 4-aminopyridin-2(1*H*)-one **1a** (20 mmol, 2.20 g, 1.0 equiv.), **2a** (22 mmol, 8.84 g, 1.1 equiv.) in EtOH (100 mL) was added. The resulting solution was stirred at 0 oC for 3 h. The precipitate was dilute with EA (150 mL), filtered, and dried in vacuum. The pyridone-bbased aryl-λ3‑iodonium salt **3** was obtained as white solid (9.09 g, 94% yield), which was directly used without further purification.

**Step 2**: In a round bottom flask fitted with a magnetic stirrer, a solution of **3** (10 mmol, 4.84 g, 1.0 equiv) and K2CO3 (10 mmol, 1.41 g, 1.0 equiv) in **IL-5** ([Bmim][OTf], 50 mL) was added. The resulting solution was stirred at 90 oC for 5.5 h. After the reaction completed, the resulting solvent was diluted with H2O and extracted with EA (3 times). Finally, the combined organic phase was evaporated and dried, and then purified by column chromatography on silica gel (PE/DCM/EA: 4/1/1, v/v/v). to give the expected product **5** as white solid (2.22 g, 71% yield).

(2) Downsteam derivatizations of **5**:

**5** (64 mg, 0.2 mmol, 1.0 equiv.), N-bromosuccinimide (NBS) (36 mg, 0.2 mmol, 1.0 equiv.) were added into a Schlenk tube in CH3CN (1 mL), the reaction mixture was stirred at room temperature for 24 h. After the reaction completed, the resulting solvent was evaporated and dried, and then purified by column chromatography on silica gel (PE/EA: 5/1, v/v) to give the expected product **47** as white solid (72 mg, 91% yield).[4]

**5-Bromo-3-iodo-2-phenoxypyridin-4-amine (47)**

White solid (71 mg, 91%); **1H NMR (600 MHz, Chloroform-*d*)** δ 7.88 (s, 1H), 7.42 – 7.39 (m, 2H), 7.22 (dd, *J* = 8.1, 6.8 Hz, 1H), 7.14 – 7.12 (m, 2H), 5.27 (s, 2H); **13C NMR (150 MHz, Chloroform-d)** δ 162.2, 154.1, 152.5, 147.2, 129.6, 125.0, 121.2, 99.6, 66.9. **HRMS (ESI) m/z:** calcd. for C11H9BrIN2O+ [M + H]+: 390.8938; Found: 390.8935.

To a solution of **5** (64 mg, 0.2 mmol, 1.0 equiv.), CuCl (30 mg, 0.3 mmol, 1.5 equiv.) in MeCN (1 mL) was added *tert*-butyl nitrite (48 μL, 0.4 mmol, 2.0 equiv.) under argon atmosphere. The reaction mixture was stirred at 90 oC for 1 h. After the reaction was completed, the combined organic phase was evaporated, dried, and then purified by column chromatography on silica gel (PE/EA: 30/1, v/v) to give the expected product **48** as white solid (36 mg, 54% yield).[5]

**4-Chloro-3-iodo-2-phenoxypyridine (48)**

White solid (35 mg, 54%); **1H NMR (400 MHz, Chloroform-*d*)** δ 7.93 (d, *J* = 5.3 Hz, 1H), 7.46 – 7.40 (m, 2H), 7.26 (dt, *J* = 14.8, 1.1 Hz, 1H), 7.19 – 7.13 (m, 2H), 7.07 (d, *J* = 5.3 Hz, 1H); **13C NMR (125 MHz, Chloroform-*d*)** δ 164.1, 153.9, 151.1, 147.1, 129.8, 125.5, 121.6, 119.7, 85.7. **HRMS (ESI) m/z:** calcd. for C11H8ClINO+ [M + H]+: 331.9334; Found: 331.9333.

To a solution of **5** (64 mg, 0.2 mmol, 1.0 equiv.), CuBr2 (67 mg, 0.3 mmol, 1.5 equiv.) in dried MeCN (1 mL) was added *tert*-butyl nitrite (48 μL, 0.4 mmol, 2.0 equiv.) under argon atmosphere. The reaction mixture was stirred at 65 oC for 2 h. After the reaction completed, the resulting solvent was diluted with H2O and extracted with EA (3 times). Finally, the combined organic phase was evaporated and dried, and then purified by column chromatography on silica gel (PE/EA: 30/1, v/v). to give the expected product **49** as white solid (54 mg, 72% yield).[6]

**4-Bromo-3-iodo-2-phenoxypyridine (49)**

White solid (54 mg, 72%); **1H NMR (400 MHz, Chloroform-*d*)** δ 7.91 (d, *J* = 5.2 Hz, 1H), 7.50 – 7.44 (m, 2H), 7.33 – 7.24 (m, 2H), 7.19 (dd, *J* = 8.6, 1.2 Hz, 2H); **13C NMR (100 MHz, Chloroform-*d*)** δ 163.9, 153.9, 146.9, 142.9, 129.7, 125.5, 122.9, 121.6, 89.0. **HRMS (ESI) m/z:** calcd.for C11H8BrINO+ [M + H]+: 375.8829; Found: 375.8833.

To a ice-cooled solution of **5** (64 mg, 0.2 mmol, 1.0 equiv.), in dried MeCN (1 mL) was added *tert*-Butyl nitrite (48 μL, 0.4 mmol, 2.0 equiv.), followed by dropwise addition of TMSN3 (1.86 g, 0.6 mmol, 3.0 equiv). The reaction mixture was stirred at room temperature for 1 h. After the reaction completed, the combined organic phase was evaporated and dried, and then purified by column chromatography on silica gel (PE/EA: 50/1, v/v). to give the expected product **50** as white solid (13 mg, 19% yield).[7]

**4-Azido-3-iodo-2-phenoxypyridine (50)**

White solid (13 mg, 19%); **1H NMR (600 MHz, Chloroform-*d*)** δ 7.99 (d, *J* = 5.4 Hz, 1H), 7.44 – 7.40 (m, 2H), 7.26 – 7.23 (m, 1H), 7.15 – 7.13 (m, 2H), 6.75 (d, *J* = 5.4 Hz, 1H); **13C NMR (150 MHz, Chloroform-*d*)** δ 164.3, 154.0, 153.5, 147.8, 129.7, 125.4, 121.6, 108.7, 73.4. **HRMS (ESI) m/z:** calcd.C11H8IN4O+ [M + H]+: 338.9738; Found: 338.9732.

1. Thionyl chloride (75 μL) was added dropwise to water (0.5 mL) cooled to 0 °C, maintaining the temperature of the mixture 0-7 °C. Copper(I) chloride (20 mg) was added to the mixture. The resultant mixture was cooled to -3 °C using ice bath.
2. Hydrochloric acid (36% w/w, 0.2 mL) was added, with agitation, to **5** (64 mg, 0.2 mmol, 1.0 equiv.), maintaining the temperature of the mixture below 30 °C with ice cooling. The reaction mixture was cooled to -3 °C using an ice bath, and a solution of sodium nitrite (28 mg, 0.2 mmol, 1.0 equiv) in water (0.3 mL) was added dropwise slowly, maintaining the temperature of the reaction mixture between -3 to 0 °C; the resultant slurry was cooled to -2 °C and stirred for 10 min.
3. The slurry from step b was cooled to -3 °C and added to the solution obtained from step a slowly, maintaining the temperature of the reaction mixture between -3 to 3 °C. When the addition was complete, the reaction mixture was stirred at 0 °C for 75 min. The suspended solid was collected by vacuum filtration, washed with water (2 × 100 mL), and dried under vacuum at below 35 °C to give product **51** as white solid (28 mg, 38% yield).[8].

**3-Iodo-2-phenoxypyridine-4-sulfonic acid (51)**

White solid (28 mg, 34%); **1H NMR (600 MHz, DMSO-*d*6)** δ 7.56 (d, *J* = 5.8 Hz, 1H), 7.40 – 7.34 (m, 2H), 7.17 (tt, *J* = 7.4, 1.1 Hz, 1H), 7.06 – 7.01 (m, 2H), 6.61 (s, 1H), 6.45 (d, *J* = 5.8 Hz, 1H); **13C NMR (125 MHz, DMSO-*d*6)** δ 161.6, 158.2, 154.5, 144.7, 129.5, 124.1, 120.3, 105.7, 67.0. **HRMS (ESI) m/z:** calcd.for C11H7INO4S- [M - H]-: 375.9146; Found: 375.9140.

**5** (64 mg, 0.2 mmol, 1.0 equiv.), pyridin-3 -ylboronic acid (30 mg, 0.24 mmol, 1.5 equiv.), K3PO4 (30 mg, 0.24 mmol, 3 equiv.), and Pd(PPh3)2Cl2 (7 mg, 0.01 mmol, 5.0 mol%) in a tube and dried 1,4-Dioxane (1 mL) was added under argon atmosphere. The reaction mixture was stirred at 110 oC for 16 h. After the reaction completed, the combined organic phase was evaporated and dried, and then purified by column chromatography on silica gel (PE/EA: 5/1, v/v). to give the expected product **52** as white solid (54 mg, 72% yield).[9]

**2-Phenoxy-[3,3'-bipyridin]-4-amine (52)**

White solid (35 mg, 67%); **1H NMR (600 MHz, Chloroform-*d*)** δ 8.71 (s, 1H), 8.60 (d, *J* = 4.6 Hz, 1H), 7.83 (d, *J* = 5.7 Hz, 1H), 7.79 (dt, *J* = 7.9, 1.9 Hz, 1H), 7.40 (dd, *J* = 7.9, 4.8 Hz, 1H), 7.33 – 7.29 (m, 2H), 7.12 – 7.08 (m, 1H), 7.03 – 6.99 (m, 2H), 6.42 (d, *J* = 5.7 Hz, 1H), 4.25 (s, 2H); **13C NMR (150 MHz, Chloroform-*d*)** δ 161.6, 154.7, 153.3, 151.1, 149.0, 147.2, 138.4, 129.5, 129.3, 124.3, 124.1, 121.0, 106.9, 105.8. **HRMS (ESI) m/z:** calcd.for C16H14N3O+ [M + H]+: 264.1132; Found: 264.1128.

To a solution of **5** (64 mg, 0.2 mmol, 1.0 equiv.), cesium carbonate (131 mg, 0.4 mmol, 2.0 equiv.) , Pd(OAc)2 (3 mg, 0.01 mmol, 10 mol%)/PPh3 (5 mg, 0.02 mmol, 20 mol%) in dried 1,4-Dioxane (1 mL) was added *t*-BuNC (44 mg, 0.44 mmol, 2.2 equiv.) under argon atmosphere. The reaction mixture was stirred at 100 oC for 12 h. After the reaction completed, the combined organic phase was evaporated and dried, and then purified by column chromatography on silica gel (PE/EA: 5/1, v/v). to give the expected product **53** as yellow solid (46 mg, 65% yield).[10]

**(*Z*)-*N*-(Tert-butyl)-3-(tert-butylimino)-4-phenoxy-3*H*-pyrrolo[3,2-*c*]pyridin-2-amine (53)**

White solid (46 mg, 65%); **1H NMR (400 MHz, Chloroform-*d*)** δ 7.96 (d, *J* = 5.3 Hz, 1H), 7.45 – 7.37 (m, 2H), 7.24 – 7.18 (m, 1H), 7.15 – 7.05 (m, 2H), 6.81 (d, *J* = 5.3 Hz, 1H), 6.59 (s, 1H), 1.52 (d, *J* = 2.4 Hz, 18H);**13C NMR (100 MHz, Chloroform-*d*)** δ 162.3, 157.0, 153.4, 152.9, 151.3, 129.7, 125.0, 121.7, 110.5, 102.9, 57.1, 52.1, 31.4, 28.8. **HRMS (ESI) m/z:** calcd.for C21H27N4O+ [M + H]+: 351.2180; Found: 351.2182.

To a solution of **5** (64 mg, 0.2 mmol, 1.0 equiv.), Pd(OAc)2 (3 mg, 0.01 mmol, 5.0 mol%), 1,3-bis(diphenylphosphino)propane (DPPP) (5 mg, 0.01 mmol, 6.0 mol%) in N-methyl-2-pyrrolidone (NMP) (1 mL) was added DBU (90 μL, 0.6 mmol, 3.0 equiv.) and 1-phenylprop-2-yn-1-ol (25 μL, 0.2 mmol, 1.0 equiv.) under argon atmosphere. The reaction mixture was stirred at 100 oC for 12 h. After the reaction completed, the combined organic phase was evaporated and dried, and then purified by column chromatography on silica gel (DCM/MeOH: 50/1, v/v). to give the expected product **54** as white solid (22 mg, 37% yield).[11]

**5-Phenoxy-2-phenyl-1,6-naphthyridine (54)**

White solid (22 mg, 37%); **1H NMR (600 MHz, Chloroform-*d*)** δ 8.76 (dd, *J* = 8.7, 0.9 Hz, 1H), 8.20 – 8.16 (m, 3H), 8.00 (d, *J* = 8.7 Hz, 1H), 7.62 (d, *J* = 5.9 Hz, 1H), 7.57 – 7.53 (m, 2H), 7.53 – 7.49 (m, 1H), 7.49 – 7.44 (m, 2H), 7.29 – 7.23 (m, 3H); **13C NMR (150 MHz, Chloroform-*d*)** δ 161.9, 160.9, 153.7, 153.5, 144.1, 138.9, 133.7, 130.4, 129.9, 129.2, 128.0, 125.5, 122.0, 120.1, 118.2, 114.2. **HRMS (ESI) m/z:** calcd.for C20H15N2O+ [M + H]+: 299.1179; Found: 299.1175.

1. Synthesis of pharmaceutical intermediate **55**：

2-Aminopyridin-4(1*H*)-one **1b** (22 mg, 0.2 mmol, 1.0 equiv.) and **2r** (100 mg, 0.22 mmol, 1.1 equiv.) were added into a Schlenk tube in TFE (1 mL), the reaction mixture was stirred at 0 oC for 1 h. After the reaction completed, the solvent was removed under vacuum condition. Subsequently, K2CO3 (0.2 mmol, 28 mg, 1.0 equiv.) and **IL-5** ([Bmim][OTf], 1 mL) were added to above reaction mixture. The resulting reaction mixture was stirred at 90 oC for 5.5 h. After the reaction completed, the resulting solvent was diluted with H2O and extracted with EA (3 times). Finally, the combined organic phase was evaporated and dried, and then purified by column chromatography on silica gel (DCM/MeOH: 20/1, v/v) to give the expected product **55** as white solid (39 mg, 52% yield).

**4-(2-Fluoro-4-nitrophenoxy)-3-iodopyridin-2-amine (55)**[12]

White solid (39 mg, 52%); **1H NMR (600 MHz, DMSO-*d*6)** δ 8.22 (ddd, *J* = 9.1, 3.9, 2.8 Hz, 1H), 8.08 (dd, *J* = 7.0, 2.8 Hz, 1H), 7.81 (d, *J* = 5.6 Hz, 1H), 7.75 (t, *J* = 9.5 Hz, 1H), 6.34 (s, 2H), 6.06 (d, *J* = 5.6 Hz, 1H); **13C NMR (150 MHz, DMSO-*d*6)** δ 162.8, 161.4, δ 157.2 (d, *J* = 257.7 Hz), 149.6, δ 144.4 (d, *J* = 2.8 Hz), 141.8 (d, *J* = 13.4 Hz), 122.3 (d, *J* = 9.0 Hz), 118.5 (d, *J* = 20.7 Hz), 117.9 (d, *J* = 2.2 Hz), 101.0, 68.2. **HRMS (ESI) m/z:** calcd.for C11H8FIN3O3+ [M + H]+: 375.9589; Found: 375.9588.

(4) Synthesis of pharmaceutical intermediate **58**：

**Step 1**: 6-Aminopyrimidin-4-ol(23 mg，0.2 mmol, 1.0 equiv.), **2f** (95 mg，0.22 mmol, 1.1 equiv.) were added into a Schlenk tube in EtOH (1 mL), the reaction mixture was stirred at 0 oC for 1 h. After the reaction completed, the solvent was removed under vacuum condition. Subsequently, K2CO3 (0.2 mmol, 28 mg, 1.0 equiv.) and **IL-5** ([Bmim][OTf], 1 mL) were added to above reaction mixture. The resulting reaction mixture was stirred at 90 oC for 5.5 h. After the reaction completed, the resulting solvent was diluted with H2O and extracted with EA (3 times). Finally, the combined organic phase was evaporated and dried, and then purified by column chromatography on silica gel (PE/DCM/EA: 4/1/1, v/v/v) to give the expected product **58-1** as white solid (33 mg, 44% yield).

**Step 2**：5-Iodo-6-(3-methoxyphenoxy)pyrimidin-4-amine **58-1** (70 mg, 0.2 mmol, 1.0 equiv.), 3-ethynylaniline (28 mg, 0.24 mmol, 1.2 equiv.), CuI (2 mg, 0.004 mmol, 1.0 mol%), and Pd(PPh3)4 (3 mg, 0.002 mmol, 1.0 mol%) in a tube and dried THF (0.5 mL), NEt3 (0.5 mL) was added under argon atmosphere. The reaction mixture was stirred at 110 oC for 16 h. After the reaction completed, the solvent was cooled to room temperature. Subsequently, potassium *tert*-butoxide (72 mg, 0.6 mmol, 3.0 equiv.) was added to above reaction mixture. The resulting reaction mixture was stirred at 100 oC for 13 h. After the reaction completed, the combined organic phase was evaporated and dried, and then purified by column chromatography on silica gel (DCM/MeOH: 30/1, v/v) to give the expected product **58** as white solid (19 mg, 29% yield).[13]

**5-Iodo-6-(3-methoxyphenoxy)pyrimidin-4-amine (58-1)**

White solid (30 mg, 44%); **1H NMR (600 MHz, Chloroform-*d*)** δ 8.06 (s, 1H), 7.31 (t, *J* = 8.2 Hz, 1H), 6.81 (ddd, *J* = 8.4, 2.5, 0.9 Hz, 1H), 6.73 (ddd, *J* = 8.0, 2.2, 0.9 Hz, 1H), 6.70 (t, *J* = 2.3 Hz, 1H), 5.52 (s, 2H), 3.81 (s, 3H); **13C NMR (150 MHz, Chloroform-*d*)** δ 168.2, 164.6, 160.8, 157.6, 154.0, 130.1, 113.9, 111.7, 107.7, 59.8, 55.6. **HRMS (ESI) m/z:** calcd.for C11H12IN3O2+ [M + H]+: 343.9891; Found: 343.9889.

**3-(4-(3-Methoxyphenoxy)-7*H*-pyrrolo[2,3-*d*]pyrimidin-6-yl)aniline (58)**[14]

White solid (19 mg, 29%); **1H NMR (600 MHz, DMSO-*d*6)** δ 12.58 – 12.51 (m, 1H), 8.30 (s, 1H), 7.36 (dd, *J* = 9.0, 8.0 Hz, 1H), 7.12 (t, *J* = 8.0 Hz, 1H), 7.06 (dd, *J* = 6.9, 1.5 Hz, 2H), 6.89 – 6.86 (m, 2H), 6.84 (ddd, *J* = 8.0, 2.1, 0.9 Hz, 1H), 6.71 (d, *J* = 2.0 Hz, 1H), 6.61 – 6.58 (m, 1H), 5.18 (s, 2H), 3.77 (s, 3H); **13C NMR (150 MHz, DMSO-*d*6)** δ 161.0, 160.4, 154.6, 153.8, 150.1, 149.0, 138.7, 131.4, 130.0, 129.5, 114.4, 114.0, 113.4, 111.1, 110.8, 107.9, 106.0, 94.0, 55.4. **HRMS (ESI) m/z:** calcd.for C19H17N4O2+ [M + H]+: 333.1346; Found: 333.1342.

(5) Synthesis of CP-376395 (**63**)：

**Step 1**: **P7** (40 mg, 0.2 mmol, 1.0 equiv.), **2n** (95 mg, 0.22 mmol, 1.1 equiv.) were added into a Schlenk tube in EtOH (1 mL), the reaction mixture was stirred at 0 oC for 1 h. After the reaction completed, the solvent was removed under vacuum condition. Subsequently, K2CO3 (0.2 mmol, 28 mg, 1.0 equiv) and **IL-5** ([Bmim][OTf], 1 mL) were added to above reaction mixture. The resulting reaction mixture was stirred at 90 oC for 5.5 h. After the reaction completed, the resulting solvent was diluted with H2O and extracted with EA (3 times). Finally, the combined organic phase was evaporated and dried, and then purified by column chromatography on silica gel (PE/DCM/EA: 4/1/1, v/v/v) to give the expected product **63-1** as white solid (46mg, 51% yield).

**3-Iodo-2-(mesityloxy)-6-methyl-*N*-(pentan-3-yl)pyridin-4-amine (63-1)**

White solid (46 mg, 51%); **1H NMR (600 MHz, Chloroform-d)** δ 6.87 (s, 2H), 5.96 (s, 1H), 4.65 (d, J = 8.4 Hz, 1H), 3.36 (dt, J = 8.3, 6.0 Hz, 1H), 2.29 (s, 3H), 2.17 (s, 3H), 2.09 (s, 6H), 1.71 – 1.63 (m, 3H), 1.56 (tt, J = 14.3, 7.3 Hz, 2H), 0.97 (t, J = 7.4 Hz, 6H); **13C NMR (150 MHz, Chloroform-*d*)** δ 161.1, 156.5, 154.9, 149.3, 134.0, 131.0, 128.9, 100.9, 63.8, 55.8, 27.0, 24.1, 21.0, 16.8, 10.2. **HRMS (ESI) m/z:** calcd.for C20H27IN2NaO+ [M + Na]+: 461.1061; Found: 461.1057.

**Step 2**: 3-Iodo-2-(mesityloxy)-6-methyl-N-(pentan-3-yl)pyridin-4-amine **63-1** (44 mg, 0.1 mmol, 1.0 equiv.), methylboronic acid (36 mg, 0.6 mmol, 6.0 equiv.), K2CO3 (0.2 mmol, 28 mg, 2.0 equiv.) and Pd(PPh3)2Cl2 (7 mg, 0.01 mmol, 10 mol%.)were added into a Schlenk tube in 1,2-dimethoxyethane (0.5 mL), H2O (0.1 mL), the reaction mixture was stirred at 90 oC for 12 h. After the reaction completed, the resulting solvent was diluted with H2O and extracted with EA (3 times). Finally, the combined organic phase was evaporated and dried, and then purified by column chromatography on silica gel (PE/EA: 30/1, v/v) to give the expected product **63** as white solid (28 mg, 80% yield).[15]

**2-(Mesityloxy)-3,6-dimethyl-*N*-(pentan-3-yl)pyridin-4-amine (63)**[16]

White solid (46 mg, 52%); **1H NMR (600 MHz, Chloroform-d)** δ 6.87 (s, 2H), 5.96 (s, 1H), 4.65 (d, J = 8.4 Hz, 1H), 3.36 (dt, J = 8.3, 6.0 Hz, 1H), 2.29 (s, 3H), 2.17 (s, 3H), 2.09 (s, 6H), 1.71 – 1.63 (m, 3H), 1.56 (tt, J = 14.3, 7.3 Hz, 2H), 0.97 (t, J = 7.4 Hz, 6H); **13C NMR (150 MHz, Chloroform-*d*)** δ 161.1, 156.5, 154.9, 149.3, 134.0, 131.0, 128.9, 100.9, 63.8, 55.8, 27.0, 24.1, 21.0, 16.8, 10.2. **HRMS (ESI) m/z:** calcd.for C21H31N2O+ [M + Na]+: 327.2431; Found: 327.2429.

**7. Crossover Experiment**

In a round bottom flask fitted with a magnetic stirrer, a solution of **3** (0.1 mmol, 48.4 mg, 0.5 equiv.), **66** (0.1 mmol, 55.4 mg, 0.5 equiv.), and K2CO3 (0.2 mmol, 27.6 mg, 1.0 equiv.) in **IL-5** ([Bmim][OTf], 1 mL) was added. The resulting solution was stirred at 90 oC for 5.5 h. After the reaction completed, the resulting solvent was diluted with H2O and extracted with EA (3 times). Finally, the combined organic phase was evaporated and dried, and then purified by column chromatography on silica gel (PE/DCM/EA: 4/1/1, v/v/v). to give the product **3** as white solid (12.2 mg, 39% yield) and the product **67** as white solid (11.1 mg, 29% yield).

**Supplementary Figure 6.** Crossover experiment.

**8. DFT Calculations**

All geometry optimizations were performed at the B3LYP17-GD3(BJ)18/def2-SVP19-22 level using Gaussian 16 A0323, with subsequent single-point energy calculations conducted via the M06-2X/def2-TZVP24-26 method. The potential energy surfaces presented in Figure 6 were generated under implicit solvent model (SMD27, solvent = ethanol) and an explicit-implicit hybrid solvent model for ionic liquid systems, respectively, to account for the interaction of ionic liquid28.

**8.1 Energies (in Hartree)**

| **Complex** | **SCF-Done  Energy** | **Single Point Energy in Solvent** | **Free Energy with Corrections in Solvent** | **EZPE Energy** | **Imaginary  Frequency** |
| --- | --- | --- | --- | --- | --- |
| NO-S  (ethanol) | 0.323249 | -1802.342532 | -1802.079827 | 1801.287818 |  |
| NO-S  (IL-5) | 0.323249 | -1802.331088 | -1802.068383 | 1801.287818 |  |
| NO-IM1 | 0.191198 | -907.337752 | -907.189231 | -906.864883 |  |
| NO-IM2 | 0.434092 | -1594.678796 | -1594.308112 | 1593.580398 |  |
| N-IM3 | 0.43451 | -1594.668294 | -1594.298248 | 1593.569271 |  |
| O-IM3 | 0.434631 | -1594.676081 | -1594.304487 | 1593.575825 |  |
| N-TS2 | 0.433108 | -1594.617976 | -1594.249929 | 1593.517768 |  |
| O-TS2 | 0.433113 | -1594.620598 | -1594.250373 | 1593.517731 | -368.129 |
| N-TS1 | 0.432967 | -1594.629937 | -1594.260458 | 1593.538253 | -364.356 |
| O-TS1 | 0.433607 | -1594.637155 | -1594.2653 | 1593.549093 | -357.274 |
| N-IM5 | 0.436077 | -1594.717459 | -1594.347415 | 1593.605003 |  |
| O-IM5 | 0.436078 | -1594.737058 | -1594.364763 | 1593.639405 |  |
| O-IM4 | 0.437086 | -1594.748659 | -1594.375315 | -1593.651125 |  |
| N-IM4 | 0.436636 | -1594.767613 | -1594.398176 | 1593.675383 |  |
| O-Prod | 0.179776 | -906.943976 | -906.807007 | -906.544134 |  |
| N-Prod | 0.181136 | -906.956247 | -906.816581 | -906.550458 |  |
| Li-IM1 | 0.312562 | -1809.361228 | -1809.110548 | 1808.322664 |  |
| Li-TS | 0.311885 | -1809.310725 | -1809.060507 | 1808.270475 | -358.597 |
| Li-IM2 | 0.315719 | -1809.407386 | -1809.154603 | 1808.342339 |  |
| Li-Prod | 0.181529 | -906.96846 | -906.828687 | -906.559328 |  |
| OTs | 0.130091 | -894.975881 | -894.88443 | -894.248836 |  |
| IL | 0.225457 | -423.210207 | -423.022819 | -422.683674 |  |
| CO32_ | 0.014262 | -264.043873 | -264.054514 | -263.383039 |  |
| HCO3_ | 0.026552 | -264.567838 | -264.567046 | -264.213439 |  |
| Li | 0 | -7.42132 | -7.434068 | -7.281449 |  |
| tBuO_ | 0.118807 | -233.145644 | -233.055623 | -232.772014 |  |
| tBuOH | 0.135011 | -233.662965 | -233.556862 | -233.38688 |  |
| LiOTs | 0.133573 | -902.451445 | -902.356951 | -901.797422 |  |

**8.2 Cartesian Coordinates**

NO_S

C 3.98981800 -1.18195700 -0.45497900

C 2.59859600 -1.31829100 -0.09929900

C 2.08996500 -2.23385200 0.84694400

C 3.07190700 -3.09332600 1.47639400

C 4.38499100 -2.99282100 1.13974900

H 2.75144100 -3.82679300 2.21630800

H 5.14704600 -3.62911800 1.59379900

O 4.47957100 -0.37609500 -1.23808600

I 1.27994000 0.00121200 -1.04800500

N 0.80545600 -2.35876200 1.18824200

H -0.01099500 -1.87220600 0.74460200

H 0.56705100 -3.05253200 1.88539900

C 1.83466500 1.81598000 -0.04238000

C 0.91778100 2.37222900 0.84526700

C 3.08536800 2.36493900 -0.32904100

C 1.29447400 3.56290800 1.47948100

H -0.04786400 1.90116800 1.05480800

C 3.43038200 3.54998400 0.32766500

H 3.77219900 1.86818500 -1.01483800

C 2.53725900 4.14777600 1.22327300

H 0.59946200 4.02699100 2.18297900

H 4.40383900 4.00551200 0.13137500

H 2.81484300 5.07699100 1.72655600

N 4.82347200 -2.09486400 0.21758400

O -1.51101600 0.89387600 -0.97209200

S -1.92759700 0.02557300 0.17351000

O -1.44844300 -1.39479500 0.00702800

O -1.58166600 0.57983100 1.50950600

C -3.71350800 -0.06820000 0.08886300

C -4.46010400 -0.10125200 1.26483200

C -4.33946400 -0.14592300 -1.15814900

C -5.84989600 -0.22294600 1.18897700

H -3.94504000 -0.01990700 2.22327000

C -5.72560100 -0.26805600 -1.21838400

H -3.73389800 -0.09632600 -2.06450700

C -6.50373600 -0.31040800 -0.04798100

H -6.43891100 -0.24640100 2.10999200

H -6.21899500 -0.32701200 -2.19290100

C -8.00410800 -0.43119500 -0.13413200

H -8.30088300 -1.30353200 -0.73923200

H -8.45920500 -0.53784200 0.86133400

H -8.44777600 0.45793100 -0.61326600

H 5.80963100 -2.01919900 -0.01182600

NO-IM1

C 1.61205400 1.28955300 -0.60681000

C 1.45739300 -0.02781600 -0.01665700

C 2.27499600 -0.56121400 0.99014000

C 3.37732800 0.26427800 1.40839900

C 3.56409800 1.48929700 0.83938600

H 4.06230700 -0.09181900 2.17746800

H 4.39188300 2.13741700 1.13294800

O 0.87179300 1.79930000 -1.43307300

I -0.16529600 -1.06605800 -0.85215800

N 2.10316400 -1.76379700 1.56759900

H 1.33978500 -2.37766000 1.31608600

H 2.74222000 -2.08268100 2.28450100

C -1.83872000 -0.04659900 0.03534300

C -2.59066800 -0.72463500 0.99382000

C -2.11361300 1.24511500 -0.41149200

C -3.69257800 -0.05390000 1.53465000

H -2.34410600 -1.73703800 1.31661700

C -3.21810200 1.88942300 0.15627500

H -1.48153800 1.73755200 -1.15123700

C -4.00214200 1.24440800 1.11796800

H -4.30688300 -0.55493400 2.28576200

H -3.46317700 2.90401900 -0.16496400

H -4.86432900 1.75858500 1.54744800

N 2.73256000 1.97342300 -0.11710000

H 2.87982600 2.89841400 -0.51531500

NO-IM2

C 0.56919700 -0.50395000 1.89909600

C 0.70761400 0.13457200 0.66507100

C 0.11972700 1.40476000 0.32703700

C -0.71350000 1.44370900 2.49908000

H -1.31013500 1.99037900 3.24311100

I 1.77704800 -0.77578600 -0.92557400

C 3.64056200 0.02963100 -0.17774200

C 3.75590800 1.42162700 -0.10016000

C 4.68701900 -0.80986700 0.20607000

C 4.94682900 1.97474000 0.37722500

H 2.92026100 2.05804400 -0.40337400

C 5.87719400 -0.24296400 0.67714300

H 4.58258400 -1.89620500 0.14960200

C 6.00583500 1.14548700 0.76352700

H 5.04736400 3.06068900 0.44591700

H 6.70197900 -0.89139400 0.98310300

H 6.93481900 1.58444100 1.13503700

O -1.21862500 0.43998100 -2.45714800

O -2.55683600 -1.30908400 -2.29649200

O -0.45663000 -1.50520600 -1.55655400

C -1.41684900 -0.86289000 -2.09247900

O 0.25622600 1.91572700 -0.82226200

N 1.10928200 -1.73200400 2.19426600

H 0.73271100 -2.20457200 3.00638200

H 1.32206500 -2.34666300 1.41702100

C -0.16249400 0.22270000 2.87053800

H -0.30839200 -0.18699400 3.87191200

N -0.61150300 2.02149600 1.30407000

C -3.58841500 0.92340300 -0.85322300

C -4.13232600 1.26600200 1.26796400

C -3.58983100 2.41880800 0.77660700

N -3.26858800 2.18571800 -0.54582600

H -3.39701200 0.38704400 -1.79077900

H -4.50285800 1.02493600 2.25821000

H -3.36724300 3.36407300 1.25952200

C -2.54084400 3.11155100 -1.41335800

H -2.58935700 2.73293400 -2.43974200

H -3.00627600 4.10414400 -1.34667500

H -1.48550700 3.13021900 -1.09476200

C -4.55640100 -1.06060200 0.29027400

H -5.65644800 -1.06227000 0.34647000

H -4.24492800 -1.51003800 -0.66337000

C -3.95025400 -1.81335300 1.47499400

H -4.49983600 -2.76555900 1.56937700

H -4.16239900 -1.25650600 2.40379700

C -2.44677000 -2.09151200 1.34804800

H -1.93186200 -1.18994800 0.98062600

H -2.04126400 -2.26928000 2.35830700

C -2.11455800 -3.27348500 0.43949100

H -2.58370300 -4.20118700 0.81103600

H -2.43607200 -3.08731300 -0.59534700

H -1.02681400 -3.42621200 0.39165800

N -4.11115600 0.34237800 0.23508800

H -0.48041700 0.88922600 -1.96638200

N-IM3

O -1.57474900 1.30779000 -1.59557400

O -2.96128300 -0.42691900 -1.72920400

O -0.74954200 -0.79009300 -1.63169500

C -1.79186400 -0.05174700 -1.67003200

C -2.45333000 -1.66754900 0.75380600

C -4.65343200 -1.85497700 0.90481500

C -4.19557700 -2.86032800 0.10161300

N -2.82335200 -2.73338900 0.03576000

H -1.44902500 -1.24409600 0.86257700

H -5.65937700 -1.58562500 1.20944800

H -4.72698300 -3.64162700 -0.43239400

C -1.92676800 -3.48915800 -0.83528400

H -2.53529600 -4.10719100 -1.50585900

H -1.34279600 -2.75333200 -1.41389100

H -1.27041000 -4.13584000 -0.23479500

C -3.56626900 0.12553200 2.06744900

H -4.44058000 0.07674000 2.73426400

H -2.65111500 0.14228700 2.67301300

C -3.61516700 1.35769100 1.16431000

H -2.68512500 1.40803300 0.58045700

H -3.62028400 2.23824200 1.83375900

C -4.79945600 1.42354900 0.20118900

H -4.74289100 0.55642200 -0.47426800

H -5.75054800 1.36488800 0.76517300

C -4.75833700 2.68903800 -0.65364300

H -3.83271600 2.70155700 -1.24907700

H -5.61093400 2.72985800 -1.34947200

H -4.78655600 3.60206900 -0.03359800

N -3.54756400 -1.13301300 1.30900400

H -0.62258000 1.44429400 -1.45377600

C 1.16828500 3.63158600 -0.04313200

C 1.70294500 2.37290500 -0.58108600

C 1.08923600 1.21064800 0.03158000

C 0.14757700 1.19788300 1.09373500

C 0.25899300 3.63938900 0.95901700

H 1.52778600 4.57355500 -0.46007700

H -0.14238800 4.56648100 1.37343300

I 1.65096100 -0.65864200 -0.71646800

C 3.61844200 -0.73577800 0.15959400

C 3.86289600 -1.67035200 1.16943000

C 4.62157100 0.11833300 -0.30770100

C 5.14617600 -1.75671000 1.71944600

H 3.06378000 -2.32071400 1.53265200

C 5.89712400 0.02404700 0.25758500

H 4.37497200 0.86105800 -1.07051700

C 6.16143400 -0.91116400 1.26345200

H 5.34870500 -2.48351000 2.51009100

H 6.69048200 0.68931800 -0.09259900

H 7.16212600 -0.97875800 1.69720800

N -0.21562700 2.48317300 1.52323200

N 2.61024700 2.27825600 -1.50525500

H 2.88312500 3.20963200 -1.82796400

O -0.39173600 0.21672400 1.64018500

H -0.91664000 2.51202800 2.25324900

O_IM3

O -1.38571200 3.34377600 0.29051300

O -2.53870200 1.83450300 -0.86850600

O -0.42749500 2.35558200 -1.48356000

C -1.47300900 2.43988400 -0.77732300

C -2.57802600 0.98891500 1.81825000

C -2.90403600 -1.19028900 1.98825900

C -1.69840700 -0.90271800 2.56283500

N -1.52259200 0.46485900 2.45046800

H -2.68165200 2.03134600 1.53201900

H -3.38937200 -2.14612900 1.83387400

H -0.90753700 -1.54936500 2.93245600

C -0.33834400 1.20854600 2.87643500

H -0.33279900 2.16606100 2.34262300

H -0.37044900 1.37863000 3.96253500

H 0.53839300 0.60298400 2.59712400

C -4.68458800 0.22564500 0.77466200

H -5.43287700 0.62024600 1.48031400

H -4.44383700 1.00706700 0.04042500

C -5.22707200 -1.02836600 0.09669900

H -6.21100000 -0.74492300 -0.31510800

H -5.44262700 -1.79640800 0.86011600

C -4.36369600 -1.62314000 -1.02289600

H -3.37386600 -1.90743800 -0.63263500

H -4.84276400 -2.56440700 -1.34365100

C -4.17072200 -0.70092300 -2.22690600

H -5.14019300 -0.35967900 -2.62936200

H -3.56677000 0.18227300 -1.97046100

H -3.65048100 -1.23665400 -3.03672600

N -3.43486600 0.00383000 1.52604700

H -0.54087300 3.80389800 0.18177100

C -0.89204400 -2.26812400 -1.68522700

C -0.27009700 -0.99726200 -1.72967000

C 0.48470300 -0.68642500 -0.58406900

C 0.55139800 -1.47633100 0.62954000

C -0.74858300 -3.03623800 -0.52998500

H -1.49509800 -2.61243400 -2.52726600

H -1.23594300 -4.02203700 -0.50272400

I 1.73685000 1.03150200 -0.59236500

C 3.53904100 -0.02734700 -0.07397500

C 4.57433900 0.70539500 0.50430400

C 3.65659500 -1.38805500 -0.34082300

C 5.76996800 0.05004800 0.81791400

H 4.46210700 1.77106400 0.72034900

C 4.85495000 -2.02974700 -0.01737800

H 2.82528600 -1.94374200 -0.77799700

C 5.91017100 -1.31537100 0.55820400

H 6.58910500 0.61190400 1.27314100

H 4.95793500 -3.09966500 -0.21287500

H 6.84241200 -1.82595900 0.80996700

N -0.09986900 -2.68735900 0.57359700

N -0.38456600 -0.15617600 -2.80174200

H -1.07942400 -0.43801900 -3.48369800

O 1.15676000 -1.09752100 1.65582700

H -0.43156300 0.84640800 -2.56476100

N-TS2

O 2.47784200 0.80131400 2.46189700

O 3.90199200 -0.71931900 1.67995700

O 1.72484400 -0.86827200 1.16458900

C 2.72968200 -0.32257900 1.74324700

C 2.46257000 -1.80454000 -1.01647200

C 4.26660300 -0.86779500 -1.89572300

C 4.66590400 -1.92520600 -1.13711100

N 3.52436300 -2.51336400 -0.62069700

H 1.43144500 -2.01094600 -0.76489000

H 4.83504400 -0.14095600 -2.46578500

H 5.65727800 -2.29477600 -0.89668100

C 3.51027500 -3.46261200 0.48479400

H 4.24126800 -4.25970600 0.29352300

H 3.75706000 -2.87773600 1.38684800

H 2.50642900 -3.89253600 0.57806400

C 2.03974500 0.29722200 -2.27287500

H 2.45773900 0.64580400 -3.23016100

H 1.03673600 -0.10835400 -2.47092100

C 1.96219200 1.42377200 -1.24211600

H 1.50223300 1.01992300 -0.33093500

H 1.26671600 2.18014700 -1.64430300

C 3.29852500 2.07458300 -0.88240600

H 3.95055800 1.32610600 -0.40300700

H 3.81101300 2.41281400 -1.80418400

C 3.12165700 3.24508000 0.08431600

H 2.70325000 2.87933700 1.03240900

H 4.08613000 3.72794000 0.30537400

H 2.44292700 4.01011300 -0.32981700

N 2.88065200 -0.81460200 -1.81596700

H 1.52851700 1.05987800 2.34663900

C -0.83699400 3.64161700 0.27382900

C -0.57595200 2.34361500 0.90672700

C -1.14648500 1.24964500 0.15877400

C -1.89039200 1.36616600 -1.01449100

C -1.54384100 3.74907600 -0.87919700

H -0.42876300 4.53942400 0.74049100

H -1.72816100 4.70923800 -1.36442900

I -1.10158700 -0.70816600 0.85287000

C -3.38975700 -0.79420100 -0.33839300

C -4.36485100 -0.08336600 0.34601200

C -3.63892300 -1.98958900 -0.99677700

C -5.65478600 -0.62512500 0.39531700

H -4.12803200 0.86127500 0.84115300

C -4.93548000 -2.51281700 -0.93079400

H -2.84859400 -2.49862100 -1.55065800

C -5.94555000 -1.83875900 -0.23626600

H -6.43467200 -0.08720700 0.94110500

H -5.15171300 -3.45856300 -1.43512300

H -6.95386100 -2.25494400 -0.19049500

N -2.06709100 2.65038100 -1.51304600

N 0.11140100 2.16231500 1.99433800

H 0.41952300 3.05782300 2.38085000

O -2.46587100 0.39519800 -1.61089200

H -2.63651200 2.73773400 -2.34634900

O-TS2

O -2.15723800 -2.21371500 -1.37390000

O -2.93699800 -2.52284800 0.67551900

O -0.71568000 -2.45145900 0.35125200

C -1.90693500 -2.42308800 -0.03225300

C -3.98141900 -0.15380000 -0.37658700

C -4.13071700 1.97860100 0.22173700

C -4.02776800 1.92438000 -1.13883100

N -3.94510900 0.59055800 -1.48807100

H -3.86079300 -1.24786800 -0.26632700

H -4.20769400 2.82732700 0.89277100

H -3.97152000 2.71390900 -1.88059700

C -3.68498400 0.08313000 -2.83471600

H -3.83217900 -1.00165400 -2.82620700

H -4.37275000 0.56812100 -3.54076300

H -2.63086100 0.28463500 -3.08057300

C -4.09078200 0.21158000 2.07379900

H -5.09293300 0.39434000 2.49268800

H -3.91153600 -0.87273500 2.02984600

C -3.01759700 0.91490800 2.90599800

H -3.19322400 0.64359300 3.96113200

H -3.17320300 2.00624400 2.84926000

C -1.57881400 0.56074100 2.50861700

H -1.48213000 0.59707700 1.41173600

H -0.91089500 1.35311400 2.88838600

C -1.11900700 -0.80402500 3.01841400

H -1.14576300 -0.84115100 4.12135000

H -1.73353400 -1.61858200 2.60803300

H -0.09378800 -1.02729000 2.68539800

N -4.08923300 0.66985700 0.67543900

H -1.38365000 -1.76258000 -1.78028800

C 0.44859500 2.69050100 0.34728700

C 1.04485700 1.42202700 0.44365700

C 0.64866200 0.42149800 -0.43181900

C -0.34204500 0.63112600 -1.46706000

C -0.56197500 2.81401000 -0.61206100

H 0.71766700 3.50843700 1.01706900

H -1.09930900 3.77034400 -0.68229800

I 1.72942100 -1.35835700 -0.35919500

C 3.67308300 0.34723300 0.27929800

C 4.62344700 -0.19702800 1.13371000

C 3.98842400 1.21413400 -0.75898200

C 5.96987400 0.11374300 0.89585400

H 4.34314800 -0.87417700 1.94422600

C 5.33904900 1.50368800 -0.97859600

H 3.20596300 1.63908600 -1.39207400

C 6.33275200 0.95847400 -0.15632300

H 6.73571900 -0.32176900 1.54308800

H 5.61068200 2.16438000 -1.80601500

H 7.38374100 1.19245400 -0.33582500

N -0.95608400 1.86585100 -1.45237400

N 2.10338200 1.12597200 1.32821100

H 1.90902700 0.34090800 1.95479000

O -0.62531100 -0.23800200 -2.31631400

H 2.46141600 1.92825600 1.84681000

N-TS1

O -1.41888700 0.81887800 -1.91881700

O -3.08377000 -0.63118900 -1.65364900

O -0.96988400 -1.29718000 -1.27734200

C -1.86183400 -0.46048800 -1.61158100

C -2.97885800 -1.32729100 0.96228200

C -5.17786300 -1.23965200 1.19432900

C -4.85484900 -2.45898200 0.67075900

N -3.47981500 -2.49593900 0.54981900

H -1.93144100 -1.01584800 0.93669300

H -6.13885200 -0.79827500 1.43799100

H -5.48152000 -3.29260800 0.36963300

C -2.69312300 -3.53521700 -0.11004400

H -3.34563700 -4.06972500 -0.81116200

H -1.89043300 -3.02280500 -0.66878100

H -2.28896800 -4.23980000 0.63214400

C -3.85739800 0.85025500 1.78211100

H -4.75137300 1.09042600 2.37741900

H -2.96967800 0.91905400 2.42328700

C -3.70738700 1.78948700 0.58553000

H -2.76182000 1.56049600 0.07405500

H -3.61156100 2.81234300 0.99668700

C -4.84178400 1.73807100 -0.43596200

H -4.90412900 0.71206500 -0.82819200

H -5.80477300 1.98322800 0.05247200

C -4.57819900 2.67517100 -1.61304400

H -3.64548000 2.37871000 -2.11674700

H -5.39395200 2.63036900 -2.35159500

H -4.47954600 3.72487900 -1.28511600

N -3.98987900 -0.55801600 1.38350000

H -0.45822800 0.83194300 -1.78483000

C 1.89052600 3.29403700 -0.18362700

C 2.15111900 1.89359000 -0.47341900

C 1.15877500 0.98500600 0.00085300

C 0.05773400 1.31945800 0.84162200

C 0.77744800 3.64338500 0.51256900

H 2.57880700 4.05901000 -0.54323700

H 0.52753900 4.68366400 0.72964000

I 1.66540200 -0.99603900 -0.33956900

C 3.95064400 -0.27895000 -0.02140500

C 4.27003900 0.11768600 1.27831200

C 4.88609300 -0.92336300 -0.83525800

C 5.56729300 -0.10292700 1.75305700

H 3.52036600 0.60361100 1.90773300

C 6.17457400 -1.13949300 -0.33944100

H 4.61840900 -1.22586900 -1.84967400

C 6.52601100 -0.73232500 0.95295800

H 5.82197100 0.21705600 2.76735200

H 6.91135200 -1.63475700 -0.97800300

H 7.53448000 -0.90797400 1.33280400

N -0.09363700 2.70776800 0.99725600

N 3.21786200 1.41034200 -1.08087600

H 3.96625400 2.09406300 -1.20978700

O -0.74162800 0.56109000 1.40572200

H -0.91021800 2.99020900 1.52756400

O-TS1

O -1.41407700 3.06910000 1.23418600

O -2.71985000 1.92465500 -0.15897100

O -0.81619800 2.87570000 -0.92246400

C -1.68365800 2.59143800 -0.06203500

C -2.32714100 0.28858200 2.06189400

C -2.66519600 -1.85048400 1.61807600

C -1.39253300 -1.71973800 2.09764600

N -1.20943700 -0.37665600 2.37514900

H -2.44693500 1.36776200 2.11192100

H -3.18775600 -2.72858800 1.25847100

H -0.58857300 -2.44427000 2.18554100

C 0.01119400 0.23688300 2.89360400

H -0.00941200 1.30076400 2.62953000

H 0.05859900 0.11696200 3.98598800

H 0.86838700 -0.25290400 2.41040500

C -4.56852900 -0.18031600 1.13159800

H -5.20273900 -0.03529500 2.02048300

H -4.41427000 0.79212100 0.64312100

C -5.22263100 -1.18683800 0.19120100

H -6.24609600 -0.81252700 0.01740900

H -5.35181800 -2.15213100 0.71188400

C -4.52925400 -1.40402600 -1.15961300

H -3.50705700 -1.78349000 -1.00302900

H -5.07326400 -2.20804400 -1.68490200

C -4.46445700 -0.15573800 -2.04032500

H -5.46890400 0.27294500 -2.19860700

H -3.82093300 0.62151500 -1.60029300

H -4.06115800 -0.41011800 -3.03409100

N -3.22991300 -0.58530800 1.60294400

H -0.61445600 3.60862900 1.14947000

C -1.06269800 -1.68323100 -2.14160600

C -0.50454000 -0.39671300 -1.91536100

C 0.44971200 -0.36749200 -0.88144200

C 0.82952400 -1.50619400 -0.10618600

C -0.65319700 -2.75272800 -1.35394000

H -1.81188900 -1.81621300 -2.92416700

H -1.10329600 -3.73817500 -1.53439500

I 1.66580800 1.29948900 -0.46161100

C 3.36377000 -0.36679700 0.15569400

C 4.11237200 -0.02506900 1.27376500

C 3.88441000 -1.06448100 -0.92515100

C 5.45403400 -0.42393100 1.30775400

H 3.66795500 0.52267700 2.10618200

C 5.22688900 -1.45342700 -0.86527800

H 3.25959600 -1.32044300 -1.78324500

C 6.01702300 -1.13494000 0.24413600

H 6.05921600 -0.16932800 2.18198200

H 5.65222600 -2.01236700 -1.70296400

H 7.06475500 -1.43981500 0.27921700

N 0.24614400 -2.70050000 -0.36977200

N -0.85321400 0.69374600 -2.64693400

H -1.67249200 0.57325500 -3.23091600

O 1.72026200 -1.39761100 0.81703300

H -0.82424700 1.61192000 -2.16419400

N-IM5

O 2.69860000 -2.33428900 -1.22064300

O 3.82472600 -0.45762900 -0.80876900

O 2.13210300 -1.05610300 0.53912300

C 2.92772800 -1.23147800 -0.43927400

C 1.55508400 1.38363700 -0.75267500

C 1.43930000 3.56005200 -1.18811800

C 1.63475300 2.90085100 -2.36896000

N 1.70472800 1.55186700 -2.07331100

H 1.61500300 0.42218500 -0.18829000

H 1.33432200 4.61849000 -0.97021100

H 1.74148200 3.27476300 -3.38276300

C 2.07703100 0.48538500 -3.00595400

H 1.90894500 0.84177700 -4.02981800

H 3.12325700 0.20702700 -2.81431900

H 1.46282700 -0.40023800 -2.80537500

C 1.23640400 2.84039600 1.24380000

H 1.64117400 3.84652300 1.43193600

H 0.15848000 2.85391900 1.46676500

C 1.94554200 1.79926400 2.10605700

H 1.51124600 0.80460100 1.92724600

H 1.72180200 2.06257400 3.15576800

C 3.45901800 1.69459700 1.90245600

H 3.67897100 1.40007400 0.86338800

H 3.92832600 2.68009300 2.08292900

C 4.06602000 0.62616400 2.80881300

H 3.62593500 -0.35056700 2.55536500

H 5.15433200 0.55343300 2.66179100

H 3.88043000 0.83764800 3.87691700

N 1.39655500 2.59339400 -0.19722700

H 1.89267000 -2.78362700 -0.88593900

C 0.11468800 -2.93516100 2.25110800

C -0.07805500 -2.80429300 0.80726100

C -0.71861100 -1.54116900 0.41644700

C -0.90690200 -0.54015300 1.31579600

C -0.10795200 -1.90701800 3.10140400

H 0.52352800 -3.87041200 2.63642300

H 0.09475000 -1.96150800 4.17147300

I -1.20457600 -1.25110900 -1.60923500

C -2.65399300 0.99986600 0.79149900

C -3.67189500 0.09754600 1.10241300

C -2.93987700 2.25381900 0.24855900

C -4.99808000 0.46866600 0.86458800

H -3.43086100 -0.88683600 1.50580900

C -4.26900800 2.61119600 0.02075100

H -2.11551500 2.92388700 -0.00158200

C -5.30390800 1.72161500 0.32771600

H -5.79860700 -0.23623600 1.10060700

H -4.49653800 3.59054700 -0.40673500

H -6.34294600 2.00199900 0.14373800

N -0.60409800 -0.71057800 2.64483800

N 0.28126800 -3.66980600 -0.08236300

H 0.71276100 -4.48074800 0.37021700

O -1.31503100 0.72465400 1.01549200

H -0.69930800 0.08953300 3.25682100

O-IM5

O 0.61590100 0.19804600 2.32979800

O 2.09240800 -1.41590400 2.62556000

O 0.13386700 -1.94582300 1.71582100

C 0.99473100 -1.08507900 2.23611700

C 3.28201500 0.88729900 1.10610500

C 3.87836600 0.84132400 -1.02343100

C 3.12727600 1.96451800 -0.82289800

N 2.77430300 1.97360800 0.51348300

H 3.11981500 0.57431900 2.13428000

H 4.30096900 0.44228700 -1.93776000

H 2.69203100 2.67619500 -1.52122000

C 1.91919400 2.97921800 1.14495000

H 1.50671700 2.55545900 2.06671400

H 2.50919600 3.88032300 1.36652800

H 1.11100000 3.20439800 0.43085300

C 4.65868900 -1.08696900 0.47641800

H 5.70866700 -0.84868900 0.70972600

H 4.18721300 -1.49750500 1.37981500

C 4.58661500 -2.07782000 -0.68346500

H 5.22967500 -2.93128400 -0.40857400

H 5.06139800 -1.63038500 -1.57281400

C 3.17720400 -2.57632000 -1.02491300

H 2.49170100 -1.71956600 -1.12868800

H 3.21009000 -3.04198600 -2.02429100

C 2.61006500 -3.57403000 -0.01571000

H 3.22866000 -4.48624000 0.02844400

H 2.54655800 -3.15101300 0.99728100

H 1.58956700 -3.87452100 -0.29854500

N 3.95949400 0.17920400 0.19156800

H -0.27223500 0.40531600 1.96140400

C -0.05634000 -1.26149300 -2.17695200

C -0.82091200 -0.68580000 -1.14576000

C -0.70448500 0.68450200 -0.93122300

C 0.21086300 1.52042100 -1.69776100

C 0.78422100 -0.41309800 -2.90311400

H -0.12820300 -2.32833600 -2.39834500

H 1.38873400 -0.84312500 -3.71536200

I -1.84182100 1.68397800 0.57943800

C -3.03579000 -1.43320200 -0.27445900

C -3.71674900 -2.07549800 0.76633700

C -3.75285300 -0.73427200 -1.25102800

C -5.10973500 -2.02226600 0.82766200

H -3.14518100 -2.60539300 1.53255500

C -5.14548300 -0.67172400 -1.17434100

H -3.21793500 -0.23210800 -2.05825500

C -5.82995500 -1.31505200 -0.13981300

H -5.63369600 -2.52608500 1.64341400

H -5.69922000 -0.11596000 -1.93472300

H -6.91957700 -1.26318100 -0.08539400

N 0.93127600 0.88272700 -2.69085800

N -1.60189600 -1.53905700 -0.30948200

H -0.61051600 -1.57518700 1.15519700

O 0.39782800 2.72951500 -1.44972000

H -1.34280400 -2.50858000 -0.49342800

O-IM4

O -2.80161800 1.74840900 2.22708900

O -3.34090000 0.49719000 0.46226400

O -2.82893000 2.68356600 0.18448000

C -3.02237200 1.64198500 0.83193700

C -1.74117800 -1.04000700 2.00601000

C -0.93376600 -2.79243400 0.92516700

C 0.12485900 -2.04805200 1.36202300

N -0.40602000 -0.96236900 2.03937800

H -2.41567500 -0.28932600 2.41200200

H -0.95156800 -3.70246600 0.33737100

H 1.19148000 -2.17652900 1.20835400

C 0.33738100 0.12553600 2.66873800

H -0.34597300 0.97455200 2.78796700

H 0.72403500 -0.19563600 3.64737000

H 1.16324300 0.42023800 2.01150100

C -3.49331300 -2.50564200 1.07128200

H -3.89078000 -2.99157600 1.97637800

H -4.00429500 -1.54239900 0.92871300

C -3.67675000 -3.42445300 -0.13178800

H -4.74595500 -3.69710000 -0.14013300

H -3.13743200 -4.37331700 0.03778500

C -3.29727900 -2.83691600 -1.49705500

H -2.22826600 -2.57001300 -1.50643700

H -3.41581100 -3.63870000 -2.24640700

C -4.11963300 -1.61321800 -1.90324300

H -5.20078500 -1.83067000 -1.86449700

H -3.91487900 -0.75047100 -1.24997300

H -3.88692500 -1.32075900 -2.94012800

N -2.08761200 -2.14621300 1.33894200

H -2.55910100 2.67584200 2.36730000

C -0.67832200 -0.56582500 -2.58818500

C -0.71042300 0.67311800 -1.88418600

C 0.40075100 0.91801400 -1.03224500

C 1.37296400 -0.08079100 -0.88554200

C 0.35418500 -1.45702600 -2.37741500

H -1.48461100 -0.80337300 -3.28387000

H 0.37211200 -2.41195800 -2.91451400

I 0.65696700 2.80184400 -0.09531900

C 3.52150000 -0.60364200 0.04964200

C 3.96938500 -1.04728900 1.29624200

C 4.27031900 -0.85171600 -1.10527200

C 5.17575500 -1.74745900 1.39068500

H 3.37659000 -0.82532800 2.18551700

C 5.47003000 -1.55494500 -0.99910000

H 3.90912100 -0.50151900 -2.07133600

C 5.92794600 -2.00773700 0.24371500

H 5.52625900 -2.08819100 2.36786100

H 6.05624800 -1.74965500 -1.90037400

H 6.86925400 -2.55676000 0.31557400

N 1.36140800 -1.24198700 -1.51690000

N -1.71761000 1.55234300 -2.07170900

H -2.51934800 1.17830600 -2.56704800

O 2.36465100 0.14565300 0.03415600

H -2.01521500 2.16910200 -1.28742900

N-IM4

O 3.39964500 3.11222300 1.06714100

O 3.23379700 0.94643100 0.62873500

O 5.14215700 1.75604300 1.50993800

C 3.99329300 1.85384100 1.07665900

C 3.42029900 -1.59166200 0.12309400

C 4.93761800 -1.65729600 -1.48881900

C 5.59261600 -1.64785600 -0.29139400

N 4.62590400 -1.62588500 0.69783400

H 2.43793000 -1.49927900 0.60011600

H 5.31166400 -1.67920000 -2.50736800

H 6.65267300 -1.64626300 -0.05781000

C 4.88129500 -1.34715700 2.10719800

H 5.67712900 -2.01007900 2.47358400

H 5.16730400 -0.28351100 2.19009100

H 3.96118900 -1.53079900 2.67431600

C 2.49711700 -1.42359400 -2.17432700

H 2.82762700 -1.87304900 -3.12304200

H 1.62048900 -1.97279000 -1.80658700

C 2.14910900 0.05733200 -2.33384900

H 1.75836200 0.41713200 -1.37476600

H 1.32061100 0.12014100 -3.06085600

C 3.30174100 0.96392500 -2.76248400

H 4.14745500 0.82173500 -2.07138300

H 3.65527900 0.67422100 -3.77010700

C 2.90908000 2.44078300 -2.73741900

H 2.68389800 2.75522500 -1.70626700

H 3.72600300 3.07884800 -3.10956900

H 2.02054800 2.63529700 -3.36144400

N 3.58224700 -1.63291100 -1.20479900

H 4.06429700 3.71161200 1.43812300

C -1.29801700 2.43853800 1.11754600

C -2.12870900 1.28982600 0.91395400

C -1.51685700 0.05322400 0.71398500

C -0.07415900 -0.08210800 0.64066300

C 0.06204800 2.29687600 1.06731300

H -1.75177300 3.41844300 1.26830500

H 0.76577700 3.12291000 1.19342800

I -2.57583000 -1.77292000 0.67856700

C -4.46327600 1.06544000 0.03037000

C -4.11280500 0.64753300 -1.26350400

C -5.82049300 1.11501600 0.38860600

C -5.10579400 0.27370200 -2.16883100

H -3.06298800 0.61798700 -1.55632700

C -6.80622900 0.75360000 -0.52877500

H -6.09475900 1.42800100 1.39938600

C -6.45615800 0.32346400 -1.81226500

H -4.81638700 -0.05474800 -3.17012200

H -7.85718800 0.79852700 -0.23260300

H -7.22816900 0.03070800 -2.52700600

N 0.63092200 1.09872100 0.82560700

N -3.50345800 1.48169300 0.97114900

H -3.78566600 2.28701500 1.51793200

O 0.53666400 -1.14488500 0.44596700

H 1.69993700 1.04629400 0.76681000

O-Prod

C -1.45909400 2.94952100 -0.20826200

C -2.07771200 1.67813200 -0.09013600

C -1.21671400 0.56081900 -0.05500300

C 0.17182700 0.76389000 -0.13824100

C -0.07901300 3.02348900 -0.27956500

H -2.07063100 3.85390600 -0.23786800

H 0.41105200 3.99909200 -0.37136100

I -2.00033100 -1.40337900 0.11154500

N 0.72972600 1.95739400 -0.24716400

N -3.42957700 1.56636500 0.00735100

H -4.01004900 2.37346600 -0.16941700

O 0.95324000 -0.34223200 -0.12965500

H -3.85811000 0.65023000 -0.03897600

C 2.33061400 -0.26525900 -0.03944000

C 3.06584300 -0.98023800 -0.98497700

C 2.96783700 0.41784200 0.99980600

C 4.45949700 -1.01323800 -0.89076700

H 2.53243700 -1.50494400 -1.77934000

C 4.36042600 0.38203200 1.08075700

H 2.37717600 0.97316600 1.72782200

C 5.11105200 -0.33057600 0.13934100

H 5.03680200 -1.57468400 -1.62921700

H 4.86380700 0.91600400 1.89035800

H 6.20071900 -0.35405400 0.21098500

N-Prod

C 1.53231600 2.59151800 -0.33892200

C 0.70963200 1.40768900 -0.37467200

C 1.27717800 0.18986300 -0.02103100

C 2.65162000 0.08066200 0.46446000

C 2.82321700 2.50368100 0.08185200

H 1.10657500 3.55642800 -0.61436100

H 3.48633400 3.36869600 0.13762700

I 0.32634400 -1.66765100 -0.31173400

N 3.33863500 1.31270300 0.48078800

N -0.59539300 1.57720900 -0.80622100

H -0.74002400 2.39158900 -1.39167400

O 3.23210800 -0.93179700 0.81441600

H 4.30153400 1.24173900 0.79625400

C -1.77443800 1.06953400 -0.22555700

C -1.81901000 0.62396500 1.10470300

C -2.95027800 1.06128300 -0.99229200

C -3.02008600 0.16516600 1.64534200

H -0.91335600 0.63776200 1.71173900

C -4.14929100 0.61484700 -0.43776000

H -2.91312500 1.39568000 -2.03226000

C -4.19110000 0.15713100 0.88257800

H -3.03843100 -0.18529300 2.68007200

H -5.05577900 0.61445300 -1.04791300

H -5.12806000 -0.20257500 1.31292200

Li-IM1

C -2.47808000 -1.87227700 1.10730300

C -2.94376800 -1.11035400 -0.03589300

C -4.28944800 -1.04857300 -0.44480800

C -5.19122700 -1.80125200 0.32960600

C -4.68535700 -2.52257500 1.41494100

H -6.25643000 -1.80948400 0.08994800

H -5.38949500 -3.11117500 2.01894700

O -1.26545300 -1.89029500 1.44897100

I -1.42753000 -0.06828000 -1.06536400

N -4.73428500 -0.25741000 -1.48252400

H -4.06497900 -0.00180500 -2.20003300

H -5.66057000 -0.46425400 -1.83690600

C -1.61604500 1.84193000 -0.07519500

C -2.90044300 2.29123000 0.22448800

C -0.45430800 2.53207700 0.25226700

C -3.01627600 3.51004900 0.89964600

H -3.78591500 1.71913600 -0.05633300

C -0.60412000 3.75262500 0.92243400

H 0.52848200 2.13169600 0.00468400

C -1.87317200 4.23753800 1.24671900

H -4.00965600 3.88800600 1.15207600

H 0.28971200 4.31565900 1.20020500

H -1.97420600 5.18756600 1.77618500

N -3.41905000 -2.57121200 1.79892600

O 1.50319100 0.08172800 1.29595400

S 2.02329200 -0.31274200 -0.06415700

O 1.60205300 -1.73933300 -0.29233000

O 1.62882000 0.60998000 -1.16101900

C 3.80379600 -0.26908700 0.01330400

C 4.44789600 -0.28290200 1.24917900

C 4.53453000 -0.25664400 -1.17893800

C 5.84415900 -0.29534700 1.28865400

H 3.85450400 -0.26794600 2.16441300

C 5.92537600 -0.27270200 -1.12158800

H 4.00900500 -0.22283300 -2.13457400

C 6.60353000 -0.29513300 0.11033000

H 6.35328700 -0.30153500 2.25591800

H 6.50124200 -0.26265200 -2.05115200

C 8.10987800 -0.31492000 0.14929900

H 8.53325900 0.54989600 -0.38743700

H 8.48875500 -0.29289300 1.18114200

H 8.50645300 -1.22124600 -0.33779600

Li 0.46196300 -1.61726500 1.33121000

Li-TS

C -3.40785600 1.49452500 -0.83184500

C -2.13488900 1.48507400 -0.26640600

C -1.62316900 2.57940200 0.52485400

C -3.68744400 3.62993500 0.17647000

H -4.30019700 4.51892600 0.37771000

I -1.07252200 -0.32720700 -0.37601500

C -3.47102900 -1.33694000 -0.23118800

C -4.05349200 -1.05781600 0.99312400

C -3.62604000 -2.52621200 -0.92288400

C -4.82676200 -2.06902100 1.57595300

H -3.90747300 -0.09374200 1.48543700

C -4.41091900 -3.51858200 -0.31555400

H -3.13961700 -2.70667600 -1.88339600

C -5.00843400 -3.29566400 0.92713900

H -5.28659200 -1.88549400 2.55018300

H -4.53916900 -4.47551800 -0.82769600

H -5.61242300 -4.07673700 1.39235500

O 1.87535500 0.96849000 -0.56395200

S 2.39851800 -0.10852600 0.36230100

O 2.19582500 0.41235500 1.76331200

O 1.84162000 -1.45292400 0.11222900

C 4.16045100 -0.22001800 0.09069100

C 4.85745800 0.86828700 -0.43209100

C 4.82848400 -1.39506100 0.44675600

C 6.24248100 0.78002000 -0.58786700

H 4.31150900 1.76540800 -0.72768300

C 6.21040100 -1.46602100 0.28815200

H 4.25765600 -2.24138200 0.83198400

C 6.94077400 -0.38135100 -0.22784700

H 6.79127700 1.62999600 -1.00197000

H 6.73629000 -2.38394200 0.56553900

C 8.43621400 -0.47790300 -0.38967500

H 8.85568200 0.43746200 -0.83142600

H 8.93045200 -0.64173800 0.58239400

H 8.71296200 -1.32574100 -1.03780900

Li 1.17034400 1.90520600 1.05821600

O -0.47383900 2.55881900 1.03509200

C -4.23734100 2.60178000 -0.60099700

H -5.24004500 2.66965700 -1.02608200

N -2.47200400 3.63389100 0.70334300

N -3.83834500 0.32977900 -1.49479900

H -4.82841900 0.31681200 -1.73901700

H -3.25811900 0.04925300 -2.28712900

Li-IM2

C -3.42508200 1.16038500 -0.33829200

C -2.05883800 1.21191400 -0.14347400

C -1.48176800 2.35157700 0.55953400

C -3.65010700 3.22639700 0.76910700

H -4.26508500 4.05391600 1.14730000

I -0.75154700 -0.30880000 -0.84177800

O 2.58172800 1.29156800 -0.82896700

S 2.78629600 -0.04021700 -0.15046300

O 2.21261900 0.10364400 1.23901500

O 2.29143100 -1.21824100 -0.89208800

C 4.55124700 -0.26499200 0.03109500

C 5.40949400 0.82964200 -0.05411000

C 5.04874900 -1.54482200 0.29414000

C 6.78023000 0.64008100 0.13850500

H 4.99906500 1.81358600 -0.28556200

C 6.41698100 -1.71742200 0.48745700

H 4.36002400 -2.39032600 0.33215200

C 7.30516300 -0.62976300 0.41549400

H 7.45604300 1.49664700 0.06769800

H 6.80901400 -2.71756300 0.69350000

C 8.78362300 -0.83836400 0.62348400

H 9.19745400 -1.53226600 -0.12714700

H 9.33981700 0.10750900 0.55134400

H 8.98831300 -1.27737600 1.61403800

Li 1.41075100 1.79871700 0.68502000

O -0.24969100 2.44171400 0.76966100

C -4.28550500 2.16267200 0.11146700

H -5.36718900 2.11431100 -0.01914800

N -2.34879700 3.32138700 0.98184500

N -3.98076300 -0.02238200 -1.03647000

H -4.51884500 0.28150300 -1.85624900

H -3.13938400 -0.54195200 -1.39233100

C -4.80495600 -0.91696600 -0.20534700

C -6.12468100 -1.16192900 -0.57166800

C -4.22784300 -1.48744000 0.92806900

C -6.89579400 -2.01398300 0.22450100

H -6.55377800 -0.69635200 -1.46304700

C -5.00802400 -2.33874500 1.71091100

H -3.19240900 -1.26556000 1.19227400

C -6.33752500 -2.60120300 1.36199000

H -7.93375000 -2.21455700 -0.04772400

H -4.57258900 -2.79656400 2.60109200

H -6.94168500 -3.26599400 1.98264000

Li-Prod

C -0.11882300 0.75718300 -0.17537400

C 1.25007300 0.52553600 -0.05788800

C 2.24589900 1.58109700 -0.04966500

C 0.35290900 3.12479200 -0.31240400

H 0.06942600 4.17224900 -0.43038900

I 2.02657900 -1.43112300 0.11778400

O 3.45529000 1.46237100 0.05675800

C -0.56624000 2.12053000 -0.31927800

H -1.61885400 2.34517200 -0.46887600

N 1.67842500 2.86824600 -0.17202600

N -1.01489800 -0.27951500 -0.20957000

H -0.59702900 -1.19943900 -0.32578300

C -2.41302400 -0.24577500 -0.07426700

C -3.18160700 -1.15671100 -0.81895800

C -3.06141800 0.62300400 0.82054200

C -4.56859300 -1.19055200 -0.67884100

H -2.67955100 -1.83308500 -1.51503300

C -4.45201800 0.59700100 0.93676000

H -2.47332400 1.29959000 1.44129100

C -5.21392000 -0.30665200 0.19101700

H -5.15017900 -1.90677000 -1.26412200

H -4.94213300 1.27902100 1.63582200

H -6.30094900 -0.32732200 0.29266400

H 2.35746300 3.62329100 -0.16084200

OTs

O 2.36549800 -1.21158200 -0.77081200

S 1.99310300 -0.00088500 0.00843600

O 2.29210300 -0.09023800 1.46099400

O 2.37535200 1.29082000 -0.62163100

C 0.16701100 0.00534800 -0.04304000

C -0.53569200 1.21046200 -0.03631600

C -0.53768900 -1.20266300 -0.03666200

C -1.93372500 1.20724400 -0.00971800

H 0.03782100 2.13939300 -0.06591100

C -1.93209600 -1.19998400 -0.00960700

H 0.03431400 -2.13252300 -0.06872600

C -2.65552800 0.00517000 0.00678300

H -2.47862100 2.15768000 -0.00593400

H -2.47663500 -2.15102700 -0.00621700

C -4.16526500 -0.00507400 0.02482500

H -4.55793400 -0.59952800 0.86801100

H -4.57333000 1.01370100 0.11535100

H -4.58098200 -0.44856600 -0.89755500

IL

C -1.40169300 -0.74006200 0.38276000

C -1.03960000 1.40388900 -0.00041000

C -2.31742000 1.11510700 -0.39370900

N -2.52217400 -0.22942000 -0.14590500

H -1.25766800 -1.77544700 0.68389200

H -0.48484300 2.33812900 -0.02156500

H -3.09075600 1.74911700 -0.81960700

C -3.76219100 -0.96359600 -0.40790600

H -4.58035300 -0.52985200 0.18302300

H -4.00535900 -0.90566100 -1.47748900

H -3.62542600 -2.01357900 -0.12315300

C 0.89757000 0.06823300 0.95841400

H 1.11644500 0.92151900 1.61696400

H 0.91986600 -0.83819400 1.58015300

C 1.90057100 -0.02155700 -0.18964200

H 1.82735800 0.88810900 -0.81066800

H 1.62800600 -0.86953600 -0.84179800

C 3.33579000 -0.18949600 0.31701500

H 3.58850300 0.65771300 0.97867900

H 3.39553600 -1.09580300 0.94521900

C 4.35254900 -0.27978100 -0.81940000

H 4.33892900 0.62932900 -1.44189200

H 5.37275200 -0.39985100 -0.42664100

H 4.14379900 -1.13948000 -1.47630500

N -0.48929000 0.23328700 0.48425400

CO32_

C 0.00000000 0.00000000 0.00001200

O 0.00000000 0.00000000 1.30611200

O 0.00000000 1.13118400 -0.65306000

O 0.00000000 -1.13118400 -0.65306000

HCO3_

C 0.15764200 0.06902500 -0.00000400

O -0.12145400 1.28707100 -0.00000100

O -1.01170000 -0.78107100 0.00003000

O 1.22948900 -0.54292900 -0.00003200

H -1.71653000 -0.11872000 0.00004700

tBuO_

O -0.00008600 0.00005800 1.47903800

C 0.00002100 -0.00000100 0.16415400

C -0.79699200 -1.22357900 -0.43760800

H -1.83033700 -1.18331500 -0.04976600

H -0.83305700 -1.27843000 -1.54660600

H -0.34199800 -2.15248600 -0.05038100

C -0.66119900 1.30194000 -0.43767000

H -0.10898300 2.17671300 -0.05080500

H -0.69158800 1.36011400 -1.54666600

H -1.69276900 1.37293000 -0.04951400

C 1.45824500 -0.07840600 -0.43754500

H 1.52381400 -0.08149800 -1.54654300

H 2.03541400 0.77964800 -0.04966200

H 1.93974600 -0.99386700 -0.05034900

HOtBu

O 0.03515900 0.00001800 1.44738500

H 0.96388800 0.00031700 1.71467900

C -0.00634300 -0.00000500 0.01861200

C 0.68234000 -1.26178500 -0.51726100

H 0.62947400 -1.31729600 -1.61610200

H 1.74851200 -1.27349500 -0.23313400

H 0.20654700 -2.16064100 -0.09678300

C 0.68084900 1.26260200 -0.51721500

H 0.62771500 1.31822200 -1.61603700

H 0.20412400 2.16085900 -0.09651500

H 1.74705800 1.27548100 -0.23327400

C -1.49175500 -0.00086600 -0.33978600

H -1.63502600 -0.00100000 -1.43089100

H -1.98152700 -0.89170000 0.08147700

H -1.98258100 0.88942700 0.08139700

LiOTs

O 2.19362800 -1.38848900 -0.80682400

S 1.83067400 -0.16713800 -0.09618000

O 2.28319800 -0.10338200 1.35992900

O 2.33921100 1.14511900 -0.68283400

C 0.04798900 -0.06017500 -0.08191700

C -0.68740700 -1.23800200 0.08365900

C -0.59314900 1.17155200 -0.20442900

C -2.07662300 -1.16798800 0.14504600

H -0.16596600 -2.19409600 0.15124500

C -1.98765100 1.22385400 -0.14563700

H -0.00191900 2.07363200 -0.36738000

C -2.75025800 0.06119300 0.03378100

H -2.65454200 -2.08702900 0.27549900

H -2.49347900 2.18744800 -0.24836400

C -4.25519900 0.11267600 0.09072200

H -4.70190800 -0.43558100 -0.75546600

H -4.63456200 -0.35588600 1.01339400

H -4.62711600 1.14673600 0.05610200

Li 3.09140100 1.49811600 0.97477600

**9. Characterization Data for Products**

**3-Iodo-4-(phenylamino)pyridin-2(1*H*)-one (4)**

White solid (44 mg, 71%); **1H NMR (400 MHz, DMSO-*d*6)** δ 7.65 (s, 1H), 7.38 (t, *J* = 7.8 Hz, 2H), 7.23 – 7.14 (m, 4H), 5.78 (d, *J* = 7.3 Hz, 1H); **13C NMR (100 MHz, DMSO-*d*6)** δ 160.7, 155.0, 139.7, 134.7, 129.2, 124.6, 124.1, 95.6, 73.2. **HRMS (ESI) m/z:** calcd.for C11H10IN2O+[M + H]+: 312.9833; Found:312.9839.

**3-Iodo-2-phenoxypyridin-4-amine (5)**

White solid (48 mg, 77%); **1H NMR (400 MHz, Chloroform-*d*)** δ 7.67 (d, *J* = 5.5 Hz, 1H), 7.39 (dt, *J* = 8.5, 7.3 Hz, 2H), 7.22 – 7.16 (m, 1H), 7.15 – 7.10 (m, 2H), 6.30 (d, *J* = 5.6 Hz, 1H), 4.78 (s, 2H). **13C NMR (150 MHz, Chloroform-*d*)** δ 162.9, 156.0, 153.5, 146.8, 132.6, 123.3, 117.7, 105.8, 67.5. **HRMS (ESI) m/z:** calcd. for C11H10IN2O+ [M + H]+: 312.9833; Found: 312.9843.

**3-Iodo-2-(*p*-tolyloxy)pyridin-4-amine (6)**

White solid (32 mg, 49%); **1H NMR (600 MHz, Chloroform-*d*)** δ 7.66 (d, *J* = 5.4 Hz, 1H), 7.18 (d, *J* = 8.1 Hz, 2H), 7.01 (d, *J* = 8.4 Hz, 2H), 6.28 (d, *J* = 5.4 Hz, 1H), 4.79 (s, 2H), 2.34 (s, 3H); **13C NMR (125 MHz, Chloroform-*d*)** δ 163.3, 155.8, 152.0, 146.7, 134.3, 130.0, 121.2, 105.3, 67.4, 29.7, 20.9. **HRMS (ESI) m/z:** calcd.for C12H12IN2O+ [M + H]+: 326.9989; Found: 326.9988.

**2-(4-(Tert-butyl)phenoxy)-3-iodopyridin-4-amine (7)**

White solid (30 mg, 41%); **1H NMR (400 MHz, Chloroform-*d*)** δ 7.69 (d, *J* = 5.5 Hz, 1H), 7.43 – 7.36 (m, 2H), 7.12 – 7.00 (m, 2H), 6.30 (d, *J* = 5.5 Hz, 1H), 4.77 (s, 2H), 1.32 (s, 9H); 1**3C NMR (150 MHz, Chloroform-*d*)** δ 162.9, 156.3, 152.0, 147.5, 146.2, 126.6, 120.5, 105.4, 67.7, 34.6, 31.6. **HRMS (ESI) m/z:** calcd.for C15H18IN2O+ [M + H]+: 369.0459; Found: 369.0457.

**3-Iodo-2-(3-methoxyphenoxy)pyridin-4-amine (8)**

White solid (39 mg, 57%); **1H NMR (600 MHz, Chloroform-*d*)** δ 7.66 (d, *J* = 5.6 Hz, 1H), 7.29 – 7.24 (m, 1H), 6.73 (ddd, *J* = 8.3, 2.4, 1.0 Hz, 1H), 6.71 – 6.65 (m, 2H), 6.32 (d, *J* = 5.6 Hz, 1H), 4.93 (s, 2H), 3.78 (s, 3H); **13C NMR (150 MHz, Chloroform-*d*)** δ 162.8, 160.8, 156.3, 155.5, 146.4, 130.0, 113.3, 110.7, 107.1, 105.6, 67.9, 55.5. **HRMS (ESI) m/z:** calcd.for C12H12IN2O2+ [M + H]+: 342.9938; Found: 342.9934.

**2-(4-Bromophenoxy)-3-iodopyridin-4-amine (9)**

White solid (42 mg, 54%); **1H NMR (500 MHz, Chloroform-*d*)** δ 7.66 (d, *J* = 5.6 Hz, 1H), 7.51 – 7.45 (m, 2H), 7.02 (m, 2H), 6.31 (d, *J* = 5.5 Hz, 1H), 4.81 (s, 2H); **13C NMR (125 MHz, Chloroform-*d*)** δ 162.9, 156.0, 153.5, 146.8, 132.6, 123.3, 117.7, 105.8, 67.5. **HRMS (ESI) m/z:** calcd.for C11H9BrIN2O+ [M + H]+: 390.8938; Found: 390.8934.

**2-(2-Bromophenoxy)-3-iodopyridin-4-amine (10)**

White solid (55 mg, 71%); **1H NMR (400 MHz, Chloroform-*d*)** δ 7.66 – 7.60 (m, 2H), 7.39 – 7.32 (m, 1H), 7.21 (dd, *J* = 8.1, 1.6 Hz, 1H), 7.14 – 7.08 (m, 1H), 6.30 (d, *J* = 5.5 Hz, 1H), 4.80 (s, 2H); **13C NMR (150 MHz, Chloroform-*d*)** δ 162.4, 156.0, 151.6, 146.6, 133.6, 128.6, 126.6, 124.2, 116.7, 105.7, 66.8. **HRMS (ESI) m/z:** calcd.for C11H9BrIN2O+ [M + H]+: 390.8938; Found: 390.8934.

**4-((4-Amino-3-iodopyridin-2-yl)oxy)benzonitrile (11)**

White solid (61 mg, 91%); **1H NMR (600 MHz, Chloroform-*d*)** δ 7.69 (d, *J* = 5.5 Hz, 1H), 7.68 – 7.65 (m, 2H), 7.24 – 7.20 (m, 2H), 6.37 (d, *J* = 5.5 Hz, 1H), 4.88 (s, 2H); **13C NMR (150 MHz, Chloroform-*d*)** δ 162.2, 158.1, 156.3, 146.8, 133.9, 121.6, 118.9, 107.9, 106.4, 68.1. **HRMS (ESI) m/z:** calcd.for C12H9IN3O+ [M + H]+: 337.9785; Found: 337.9783.

**1-(4-((4-Amino-3-iodopyridin-2-yl)oxy)phenyl)ethan-1-one (12)**

White solid (50 mg, 71%); **1H NMR (500 MHz, Chloroform-*d*)** δ 8.03 – 7.98 (m, 2H), 7.70 (d, *J* = 5.6 Hz, 1H), 7.22 – 7.17 (m, 2H), 6.35 (d, *J* = 5.5 Hz, 1H), 4.87 (s, 2H), 2.59 (s, 3H); **13C NMR (150 MHz, Chloroform-*d*)** δ 197.1, 162.6, 158.6, 156.2, 146.9, 133.5, 130.3, 120.8, 106.1, 68.2, 26.7. **HRMS (ESI) m/z:** calcd.for C13H12IN2O2+ [M + H]+: 354.9938; Found: 354.9930.

**Methyl 4-((4-amino-3-iodopyridin-2-yl)oxy)benzoate (13)**

White solid (37 mg, 50%); **1H NMR (400 MHz, Chloroform-*d*)** δ 8.07 (d, *J* = 8.8 Hz, 2H), 7.70 (d, *J* = 5.5 Hz, 1H), 7.17 (d, *J* = 8.7 Hz, 2H), 6.35 (d, *J* = 5.6 Hz, 1H), 4.84 (s, 2H), 3.90 (s, 3H); **13C NMR (100 MHz, Chloroform-*d*)** δ 166.7, 162.6, 158.5, 156.2, 146.9, 131.5, 126.3, 120.7, 106.1, 68.2, 52.2. **HRMS (ESI) m/z:** calcd.for C13H12IN2O3+ [M + H]+: 370.9887; Found: 370.9886.

**3-Iodo-2-(4-(trifluoromethyl)phenoxy)pyridin-4-amine (14)**

White solid (31 mg, 41%); **1H NMR (400 MHz, Chloroform-*d*)** δ 7.69 (d, *J* = 5.5 Hz, 1H), 7.64 (d, *J* = 8.6 Hz, 2H), 7.23 (d, *J* = 8.5 Hz, 2H), 6.35 (d, *J* = 5.6 Hz, 1H), 4.84 (s, 2H); **13C NMR (100 MHz, Chloroform-*d*)** δ 162.6, 157.2, 156.2, 146.9, δ 127.0 (q, *J* = 3.8 Hz), δ 126.7 (q, *J* = 32.5 Hz),124.3 (q, *J* = 271.7 Hz), 121.3, 106.1, 67.9. **HRMS (ESI) m/z:** calcd.for C12H9F3IN2O+ [M + H]+: 380.9706; Found: 380.9705.

**3-Iodo-2-(3-(trifluoromethyl)phenoxy)pyridin-4-amine (15)**

White solid (50 mg, 63%); **1H NMR (600 MHz, Chloroform-*d*)** δ 7.67 (d, *J* = 5.5 Hz, 1H), 7.50 (t, *J* = 7.9 Hz, 1H), 7.46 – 7.43 (m, 1H), 7.41 (s, 1H), 7.34 – 7.31 (m, 1H), 6.33 (d, *J* = 5.5 Hz, 1H), 4.85 (s, 2H); **13C NMR (150 MHz, Chloroform-*d*)** δ 162.7, 156.2, 154.6, 146.7, δ 132.02 (q, J = 32.8 Hz), 130.1, 124.8, δ 123.86 (q, J = 272.6 Hz), 121.47 (q, J = 3.8 Hz), 118.50 (q, J = 3.9 Hz), 106.0, 67.6. **HRMS (ESI) m/z:** calcd.for C12H8F3IN2O+ [M + H]+: 380.9707; Found: 380.9710.

**3-Iodo-2-(4-(trifluoromethoxy)phenoxy)pyridin-4-amine (16)**

White solid (45 mg, 57%); **1H NMR (600 MHz, Chloroform-*d*)** δ 7.67 (d, *J* = 5.6 Hz, 1H), 7.23 (d, *J* = 8.7 Hz, 2H), 7.18 – 7.13 (m, 2H), 6.34 (d, *J* = 5.6 Hz, 1H), 4.91 (s, 2H); **13C NMR (150 MHz, Chloroform-*d*)**δ 162.66, 156.27, 152.69, 146.46, δ 145.77 (d, *J* = 2.0 Hz), 122.44 ,122.36, δ 120.60 (q, *J* = 257.0 Hz), 105.84, 67.54. **HRMS (ESI) m/z:** calcd.for C12H9F3IN2O2+ [M + H]+: 396.9656; Found: 396.9656.

**3-Iodo-2-(2-methyl-4-nitrophenoxy)pyridin-4-amine (17)**

White solid (63 mg, 85%); **1H NMR (600 MHz, Chloroform-*d*)** δ 8.16 (d, *J* = 2.8 Hz, 1H), 8.09 (dd, *J* = 8.9, 2.8 Hz, 1H), 7.66 (d, *J* = 5.5 Hz, 1H), 7.17 (d, *J* = 8.9 Hz, 1H), 6.36 (d, *J* = 5.5 Hz, 1H), 4.87 (s, 2H), 2.31 (s, 3H); **13C NMR (150 MHz, Chloroform-*d*)** δ 162.1, 158.0, 156.3, 146.9, 144.5, 132.0, 126.7, 122.8, 121.7, 106.1, 67.3, 16.8. **HRMS (ESI) m/z:** calcd.for C12H10IN3NaO3+ [M + Na]+: 393.9659; Found: 393.9655.

**3-Iodo-2-(mesityloxy)pyridin-4-amine (18)**

White solid (61 mg, 86%); **1H NMR (600 MHz, Chloroform-*d*)** δ 7.61 (d, *J* = 5.6 Hz, 1H), 6.89 (s, 2H), 6.23 (d, *J* = 5.6 Hz, 1H), 4.78 (s, 2H), 2.28 (s, 3H), 2.09 (s, 6H); **13C NMR (150 MHz, Chloroform-*d*)** δ 162.1, 155.7, 148.9, 146.9, 134.7, 130.6, 129.3, 105.0, 66.0, 21.1, 16.6. **HRMS (ESI) m/z:** calcd.for C14H16IN2O+ [M + H]+: 355.0302; Found: 355.0294.

**2-(4-Bromo-2,6-dimethylphenoxy)-3-iodopyridin-4-amine (19)**

White solid (52 mg, 62%); **1H NMR (600 MHz, Chloroform-*d*)** δ 7.60 (d, *J* = 5.5 Hz, 1H), 7.22 (s, 2H), 6.27 (d, *J* = 5.6 Hz, 1H), 4.78 (s, 2H), 2.09 (s, 6H); **13C NMR (150 MHz, Chloroform-*d*)** δ 161.8, 155.8, 150.3, 146.9, 133.4, 131.3, 118.3, 105.3, 65.9, 16.6. **HRMS (ESI) m/z:** calcd.For C13H13BrIN2O+ [M + H]+: 418.9251; Found: 418.9249.

**2-(2,6-Diisopropylphenoxy)-3-iodopyridin-4-amine (20)**

White solid (48 mg, 61%); **1H NMR (600 MHz, Chloroform-*d*)** δ 7.65 (d, *J* = 5.5 Hz, 1H), 7.32 – 7.24 (m, 3H), 6.28 (d, *J* = 5.5 Hz, 1H), 4.81 (s, 2H), 2.97 (p, *J* = 6.9 Hz, 2H), 1.29 (d, *J* = 6.9 Hz, 6H), 1.18 (d, *J* = 6.9 Hz, 6H); **13C NMR (150 MHz, Chloroform-*d*)** δ 163.1, 155.7, 148.6, 146.9, 141.2, 126.2, 124.0, 105.1, 65.7, 27.7, 24.3, 22.5. **HRMS (ESI) m/z:** calcd.for C17H21IN2NaO+ [M + Na]+: 419.0591; Found: 419.0594.

**3-Iodo-4-phenoxypyridin-2-amine (21)**

White solid (38 mg, 61%); **1NMR (600 MHz, Chloroform-*d*)** δ 7.78 (d, *J* = 5.7 Hz, 1H), 7.43 – 7.38 (m, 2H), 7.26 – 7.22 (m, 1H), 7.09 (dd, *J* = 8.6, 1.1 Hz, 2H), 5.92 (d, *J* = 5.7 Hz, 1H), 5.12 (s, 2H); **13C NMR (150 MHz, Chloroform-*d*)** δ 165.6, 159.7, 154.4, 147.8, 130.3, 125.7, 120.8, 102.7, 68.9. **HRMS (ESI) m/z:** calcd.for C11H10IN2O+ [M + H]+: 312.9833; Found: 312.9831.

**4-(4-(Tert-butyl)phenoxy)-3-iodopyridin-2-amine (22)**

White solid (48 mg, 65%); **1H NMR (400 MHz, Chloroform-*d*)** δ 7.77 (d, *J* = 5.7 Hz, 1H), 7.43 – 7.38 (m, 2H), 7.05 – 6.97 (m, 2H), 5.95 (d, *J* = 5.7 Hz, 1H), 5.11 (s, 2H), 1.33 (s, 9H); **13C NMR (100 MHz, Chloroform-*d*)** δ 163.3, 155.9, 152.1, 147.4, 146.9, 126.5, 120.7, 105.4, 67.8, 34.5, 31.6, 27.1. **HRMS (ESI) m/z:** calcd.for C15H18IN2O+ [M + H]+: 369.0459; Found: 369.0455.

**4-(4-Bromophenoxy)-3-iodopyridin-2-amine (23)**

White solid (43 mg, 55%); **1H NMR (500 MHz, Chloroform-*d*)** δ 7.85 – 7.75 (m, 1H), 7.58 – 7.46 (m, 2H), 7.03 – 6.90 (m, 2H), 5.93 (d, *J* = 5.6 Hz, 1H), 5.22 (s, 2H); **13C NMR (125 MHz, Chloroform-*d*)** δ 164.6, 160.4, 153.8, 149.3, 133.2, 122.3, 118.2, 102.8, 69.1. **HRMS (ESI) m/z:** calcd.for C11H9BrIN2O+ [M + H]+: 390.8938; Found: 390.8933.

**4-(2-Bromophenoxy)-3-iodopyridin-2-amine (24)**

White solid (29 mg, 37%); **1H NMR (400 MHz, Chloroform-*d*)** δ 7.78 (d, *J* = 5.7 Hz, 1H), 7.67 (dd, *J* = 7.9, 1.6 Hz, 1H), 7.36 (td, *J* = 7.7, 1.6 Hz, 1H), 7.19 – 7.11 (m, 2H), 5.77 (d, *J* = 5.6 Hz, 1H), 5.10 (s, 2H); **13C NMR (150 MHz, Chloroform-*d*)** δ 164.2, 160.2, 151.4, 148.9, 134.2, 129.1, 127.2, 123.0, 116.2, 101.8, 68.2. **HRMS (ESI) m/z:** calcd.for C11H9BrIN2O+ [M + H]+: 390.8938; Found: 390.8937.

**4-((2-Amino-3-iodopyridin-4-yl)oxy)benzonitrile (25)**

White solid (38 mg, 56%); **1H NMR (400 MHz, Chloroform-*d*)** δ 7.90 (d, *J* = 5.6 Hz, 1H), 7.72 – 7.65 (m, 2H), 7.15 – 7.09 (m, 2H), 6.10 (d, *J* = 5.6 Hz, 1H), 5.16 (s, 2H); **13C NMR (100 MHz, Chloroform-*d*)** δ 163.3, 160.7, 158.7, 149.7, 134.5, 119.8, 118.4, 108.3, 104.6, 70.6. **HRMS (ESI) m/z:** calcd.for C12H9IN3O+ [M + H]+: 337.9785; Found: 337.9782.

**3-Iodo-4-(3-(trifluoromethyl)phenoxy)pyridin-2-amine (26)**

White solid (51 mg, 67%); **1H NMR (400 MHz, Chloroform-*d*)** δ 7.84 (d, *J* = 5.6 Hz, 1H), 7.57 – 7.47 (m, 2H), 7.36 (t, *J* = 2.0 Hz, 1H), 7.25 (s, 2H), 5.96 (d, *J* = 5.6 Hz, 1H), 5.14 (s, 2H); **13C NMR (100 MHz, Chloroform-*d*)**δ 164.3, 160.5, 155.0, 149.5, 132.8 (q, *J* = 33.1 Hz) , 130.8, 124.9 (q, *J* = 271 Hz), 123.6, 122.0 (q, *J* = 3.8 Hz), 117.5 (q, *J* = 3.8 Hz), 103.1, 69.4. **HRMS (ESI) m/z:** calcd.for C12H9F3IN2O+ [M + H]+: 380.9706; Found: 380.9700.

**3-Iodo-4-(2-methyl-4-nitrophenoxy)pyridin-2-amine (27)**

White solid (39 mg, 53%); **1H NMR (600 MHz, Chloroform-*d*)** δ 8.20 (d, *J* = 2.8 Hz, 1H), 8.08 (dd, *J* = 8.9, 2.8 Hz, 1H), 7.86 (d, *J* = 5.6 Hz, 1H), 7.00 (d, *J* = 8.9 Hz,

1H), 5.96 (d, *J* = 5.5 Hz, 1H), 5.38 (s, 2H), 2.35 (s, 3H); **13C NMR (150 MHz, Chloroform-*d*)** δ 163.6, 160.4, 157.9, 148.9, 144.6, 131.4, 127.2, 123.4, 119.4, 103.3, 69.6, 16.5. **HRMS (ESI) m/z:** calcd.for C12H10IN3NaO3+ [M + Na]+ 393.9659; Found: 393.9651.

**4-(4-Bromo-2,6-dimethylphenoxy)-3-iodopyridin-2-amine (28)**

White solid (34 mg, 41%); **1H NMR (400 MHz, Chloroform-*d*)** δ 7.73 (d, *J* = 5.7 Hz, 1H), 7.27 (s, 2H), 5.61 (d, *J* = 5.7 Hz, 1H), 5.10 (s, 2H), 2.09 (s, 6H); **13C NMR (100 MHz, Chloroform-*d*)** δ 163.4, 160.2, 149.9, 149.5, 133.3, 131.9, 118.9, 100.1, 66.9, 16.2. **HRMS (ESI) m/z:** calcd.for C13H13BrIN2O+ [M + H]+: 418.9251; Found: 418.9247.

**3-Iodo-2-(mesityloxy)-5-methylpyridin-4-amine (29)**

White solid (64 mg, 87%); **1H NMR (600 MHz, Chloroform-*d*)** δ 7.48 (s, 1H), 6.89 (s, 2H), 4.73 (s, 2H), 2.27 (s, 3H), 2.10 (d, *J* = 1.0 Hz, 3H), 2.08 (s, 6H); **13C NMR (150 MHz, Chloroform-*d*)** δ 160.8, 154.0, 148.9, 146.1, 134.6, 130.7, 129.3, 112.2, 66.1, 21.0, 16.6, 14.6. **HRMS (ESI) m/z:** calcd.for C15H18IN2O+ [M + H]+: 369.0459; Found: 369.0457.

**6-Chloro-3-iodo-2-(mesityloxy)pyridin-4-amine (30)**

White solid (44 mg, 57%); **1H NMR (600 MHz, Chloroform-*d*)** δ 6.87 (s, 2H), 6.27 (s, 1H), 4.81 (s, 2H), 2.28 (s, 3H), 2.08 (s, 6H); **13C NMR (150 MHz, Chloroform-*d*)** δ 161.3, 156.8, 149.6, 148.7, 134.7, 130.5, 129.2, 103.7, 63.9, 21.0, 16.6. **HRMS (ESI) m/z:** calcd.for C14H15ClIN2O+ [M + H]+: 388.9912; Found: 388.9911.

**6-Fluoro-3-iodo-2-(mesityloxy)pyridin-4-amine (31)**

White solid (14 mg, 19%); **1H NMR (600 MHz, Chloroform-*d*)** δ 6.87 (s, 2H), 5.88 (s, 1H), 4.91 (s, 2H), 2.27 (s, 3H), 2.08 (s, 6H); **13C NMR (150 MHz, Chloroform-*d*)**

δ 164.2 (d, *J* = 235.1 Hz), 160.8 (d, *J* = 18.3 Hz), 158.3 (d, *J* = 11.7 Hz), 148.6, 134.9, 130.5, 129.3, 87.3 (d, *J* = 41.7 Hz), 60.5 (d, *J* = 4.7 Hz), 21.0, 16.5. **HRMS (ESI) m/z:** calcd.for C14H15FIN2O+ [M + Na]+: 373.0208; Found: 373.0203.

**3-Iodo-2-(mesityloxy)quinolin-4-amine (32)**

White solid (53 mg, 66%); **1H NMR (600 MHz, Chloroform-*d*)** δ 7.68 (dd, *J* = 8.3, 1.4 Hz, 1H), 7.62 (dd, *J* = 8.4, 1.3 Hz, 1H), 7.50 (ddd, *J* = 8.3, 6.9, 1.3 Hz, 1H), 7.30 (ddd, *J* = 8.1, 6.8, 1.2 Hz, 1H), 6.91 (s, 2H), 5.45 (s, 2H), 2.31 (s, 3H), 2.11 (s, 6H); **13C NMR (150 MHz, Chloroform-*d*)** δ 158.5, 152.6, 148.9, 134.6, 130.9, 130.1, 129.2, 128.1, 123.9, 120.5, 116.3, 63.8, 21.0, 16.8. **HRMS (ESI) m/z:** calcd.for C18H18IN2O+ [M + H]+: 405.0459; Found: 405.0454.

**3-Iodo-2-(mesityloxy)-*N*-(4-methoxybenzyl)pyridin-4-amine (33)**

White solid (34 mg, 37%); **1H NMR (500 MHz, Chloroform-*d*)** δ 7.66 (d, *J* = 5.7 Hz, 1H), 7.31 – 7.27 (m, 2H), 6.95 – 6.91 (m, 2H), 6.89 (s, 2H), 6.14 (d, *J* = 5.7 Hz, 1H), 5.25 (t, *J* = 5.4 Hz, 1H), 4.40 (d, *J* = 5.4 Hz, 2H), 3.83 (s, 3H), 2.28 (s, 3H), 2.09 (s, 6H); **13C NMR (125 MHz, Chloroform-*d*)** δ 161.9, 159.2, 155.1, 148.9, 147.5, 134.5, 130.6, 129.5, 129.2, 128.6, 114.3, 101.7, 66.6, 55.3, 47.3, 20.9, 16.5. **HRMS (ESI) m/z:** calcd.for C22H24IN2O2+ [M + H]+: 475.0877; Found:475.0870.

**3-Iodo-2-(mesityloxy)-*N*-(4-methylphenethyl)pyridin-4-amine (34)**

White solid (41 mg, 45%); **1H NMR (600 MHz, Chloroform-*d*)** δ 7.71 (s, 1H), 7.17 (s, 4H), 6.89 (s, 2H), 6.16 (s, 1H), 5.01 (t, *J* = 4.5 Hz, 1H), 3.49 (d, *J* = 6.3 Hz, 2H), 2.96 (t, *J* = 6.6 Hz, 2H), 2.36 (s, 3H), 2.28 (s, 3H), 2.08 (s, 6H); **13C NMR (150 MHz, Chloroform-*d*)** δ 161.8, 155.2, 148.9, 147.3, 136.5, 135.2, 134.7, 130.7, 129.6, 129.3, 128.8, 101.5, 66.8, 45.2, 35.0, 21.2, 21.1, 16.6. **HRMS (ESI) m/z:** calcd.for C23H26IN2O+ [M + H]+: 473.1085; Found: 473.1084.

**(*R*)-3-Iodo-2-(mesityloxy)-*N*-(1-phenylethyl)pyridin-4-amine (35)**

White solid (34 mg, 37%); **1H NMR (600 MHz, Chloroform-*d*)** δ 7.56 (d, *J* = 5.7 Hz, 1H), 7.38 – 7.32 (m, 4H), 7.28 (t, *J* = 7.2 Hz, 1H), 6.88 (s, 2H), 5.94 (d, *J* = 5.7 Hz, 1H), 5.33 (d, *J* = 5.5 Hz, 1H), 4.63 (p, *J* = 6.6 Hz, 1H), 2.27 (s, 3H), 2.07 (d, *J* = 7.2 Hz, 6H), 1.65 (d, *J* = 6.7 Hz, 3H); **13C NMR (150 MHz, Chloroform-*d*)** δ 154.7, 148.8, 143.4, 134.9, 130.7, 130.5, 129.4, 129.1, 127.7, 125.7, 102.6, 66.9, 53.8, 24.9, 21.0, 16.6. **HRMS (ESI) m/z:** calcd.for C22H24IN2O+ [M + H]+: 459.0928; Found: 459.0928.

**4-(Benzyloxy)-3-iodo-2-(mesityloxy)pyridine (36)**

White solid (52 mg, 58%); **1H NMR (600 MHz, Chloroform-*d*)** δ 7.88 (d, *J* = 5.7 Hz, 1H), 7.51 (d, *J* = 7.2 Hz, 2H), 7.43 (t, *J* = 7.7 Hz, 2H), 7.39 – 7.34 (m, 1H), 6.90 (s, 2H), 6.48 (d, *J* = 5.7 Hz, 1H), 5.26 (s, 2H), 2.29 (s, 3H), 2.08 (s, 6H); **13C NMR (150 MHz, Chloroform-*d*)** δ 166.4, 162.9, 148.7, 148.0, 135.4, 135.0, 130.4, 129.3, 128.8, 128.4, 127.0, 103.4, 71.2, 69.7, 20.9, 16.4. **HRMS (ESI) m/z:** calcd.for C21H21INO2+ [M + H]+: 446.0612; Found: 446.0607.

**3-Iodo-4-(mesityloxy)-2-methoxypyridine (37)**

White solid (52 mg, 70%); **1H NMR (400 MHz, Chloroform-*d*)** δ 7.79 (d, *J* = 5.7 Hz, 1H), 6.91 (s, 2H), 5.91 (d, *J* = 5.6 Hz, 1H), 4.02 (s, 3H), 2.30 (s, 3H), 2.06 (s, 6H); **13C NMR (100 MHz, Chloroform-*d*)** δ 165.1, 164.5, 148.6, 147.5, 135.6, 130.4, 129.8, 103.8, 69.1, 55.1, 20.9, 16.2. **HRMS (ESI) m/z:** calcd.for C15H17INO2+ [M + H]+: 370.0299; Found: 370.0296.

**3-Iodo-4-(mesityloxy)quinolin-2-amine (38)**

White solid (57 mg, 71%); **1H NMR (600 MHz, Chloroform-*d*)** δ 7.67 (d, *J* = 8.3 Hz, 1H), 7.52 (ddd, *J* = 13.0, 7.7, 3.0 Hz, 2H), 7.06 (ddd, *J* = 8.3, 6.9, 1.2 Hz, 1H), 6.86 (s, 2H), 5.66 (s, 2H), 2.30 (s, 3H), 2.06 (s, 6H); **13C NMR (150 MHz, Chloroform-*d*)** δ 161.3, 156.9, 151.1, 147.6, 134.4, 130.9, 130.1, 128.8, 125.5, 122.8, 121.4, 118.0, 70.6, 20.8, 17.4. **HRMS (ESI) m/z:** calcd.for C18H18IN2O+ [M + H]+: 405.0459; Found: 405.0458.

**5-Iodo-6-(mesityloxy)pyrimidin-4-amine (39)**

White solid (67 mg, 94%); **1H NMR (400 MHz, Chloroform-d)** δ 8.01 (s, 1H), 6.90 (s, 2H), 5.54 (s, 2H), 2.29 (s, 3H), 2.08 (s, 6H); **13C NMR (100 MHz, Chloroform-d)** δ 167.4, 164.5, 158.0, 148.1, 135.5, 130.3, 129.4, 58.7, 29.9, 21.0, 16.5. **HRMS (ESI) m/z**: calcd. for C13H15IN3O+ [M + H]+: 356.0255; Found: 356.0252.

**5-Iodo-6-(mesityloxy)-2-methylpyrimidin-4-amine (40)**

White solid (61 mg, 83%); **1H NMR (600 MHz, Chloroform-*d*)** δ 6.88 (s, 2H), 5.51 (s, 2H), 2.29 (s, 3H), 2.27 (s, 3H), 2.07 (s, 6H); **13C NMR (150 MHz, Chloroform-*d*)** δ 167.3, 167.1, 164.1, 148.4, 134.9, 130.4, 129.1, 55.5, 25.0, 21.0, 16.6. **HRMS (ESI) m/z**: calcd. for C14H16IN3O+ [M + H]+: 370.0411; Found: 370.0412.

**5-Iodo-6-(mesityloxy)-2-methoxypyrimidin-4-amine (41)**

White solid (21 mg, 27%); **1H NMR (400 MHz, Chloroform-*d*)** δ 6.84 (s, 2H), 5.38 (s, 2H), 3.65 (s, 3H), 2.26 (s, 3H), 2.07 (s, 6H); **13C NMR (100 MHz, Chloroform-*d*)** δ 165.2, 157.97, 135.48, 130.28, 129.44, 101.42, 58.55, 29.86, 21.05, 16.47. **HRMS (ESI) m/z:** calcd.for C14H17IN3O2+ [M + H]+: 386.0360; Found: 386.0352.

**5-Iodo-6-(mesityloxy)-2-(methylthio)pyrimidin-4-amine (42)**

White solid (46 mg, 57%); **1H NMR (400 MHz, Chloroform-*d*)** δ 6.84 (s, 2H), 5.37 (s, 2H), 2.28 (s, 3H), 2.11 (s, 3H), 2.06 (s, 6H); **13C NMR (100 MHz, Chloroform-*d*)** δ 163.9, 149.3, 134.9, 130.3, 128.9, 52.7, 29.8, 21.0, 16.5, 14.0. **HRMS (ESI) m/z:** calcd.for C14H17IN3OS+ [M + H]+: 402.0132; Found: 402.0131.

**4-((6-Amino-2-((4-cyanophenyl)amino)-5-iodopyrimidin-4-yl)oxy)-3,5-dimethylbenzonitrile (43)**

White solid (62 mg, 64%); **1H NMR (600 MHz, Chloroform-*d*)** δ 7.46 (s, 2H), 7.39 – 7.36 (m, 2H), 7.29 (d, *J* = 8.4 Hz, 2H), 7.16 (s, 1H), 5.55 (s, 2H), 2.17 (s, 6H); **13C NMR (150 MHz, Chloroform-*d*)** δ 166.98, 164.48, 158.17, 154.45, 143.23, 133.11, 133.09, 132.43, 119.25, 118.70, 118.21, 118.02, 109.62, 104.89, 46.73, 16.54. **HRMS (ESI) m/z:** calcd.for C20H16IN6O+ [M + H]+: 483.0425; Found: 483.0421.

**3-Iodo-2-(mesityloxy)-6-methyl-*N*-((3-methyloxetan-3-yl)methyl)pyridin-4-amine (44)**

White solid (30 mg, 22%); **1H NMR (600 MHz, Chloroform-*d*)** δ 6.87 (s, 2H), 6.08 (s, 1H), 5.43 (t, *J* = 5.9 Hz, 1H), 3.64 (ddd, *J* = 33.4, 14.4, 11.0 Hz, 4H), 3.35 – 3.26 (m, 2H), 2.29 (s, 3H), 2.18 (s, 3H), 2.08 (s, 6H), 1.09 (s, 3H); **13C NMR (150 MHz, Chloroform-*d*)** δ 161.1, 156.9, 155.6, 149.2, 134.1, 131.0, 129.0, 100.6, 66.8, 63.9, 49.5, 48.6, 41.2, 24.1, 21.0, 19.1, 16.8. **HRMS (ESI) m/z:** calcd.for C20H26IN2O2+ [M + H]+: 453.1034; Found:453.1031.

***N*-(((3r,5r,7r)-Adamantan-1-yl)methyl)-3-iodo-2-(mesityloxy)-6-methylpyridin-4-amine (45)**

White solid (32 mg, 31%); **1H NMR (600 MHz, Chloroform-*d*)** δ 6.86 (s, 2H), 6.00 (s, 1H), 4.89 (t, *J* = 5.6 Hz, 1H), 2.89 (d, *J* = 5.6 Hz, 2H), 2.29 (s, 3H), 2.16 (s, 3H), 2.09 (s, 6H), 2.06 – 2.03 (m, 3H), 1.78 (dt, *J* = 12.4, 3.1 Hz, 3H), 1.70 (d, *J* = 11.2 Hz, 3H), 1.64 – 1.61 (m, 7H); **13C NMR (150 MHz, Chloroform-*d*)** δ 161.0, 156.6, 155.5, 149.3, 134.0, 131.0, 128.9, 100.6, 63.6, 55.8, 40.8, 37.1, 34.0, 28.4, 24.1, 21.0, 16.8. **HRMS (ESI) m/z:** calcd.for C26H34IN2O+ [M + H]+: 517.1711; Found: 517.1705.

**3-Iodo-*N*-(((1R,4aS,10aR)-7-isopropyl-1,4a-dimethyl-1,2,3,4,4a,9,10,10a-octahydrophenanthren-1-yl)methyl)-2-(mesityloxy)-6-methylpyridin-4-amine (46)**

White solid (51 mg, 40%); **1H NMR (600 MHz, Chloroform-*d*)** δ 7.20 (d, *J* = 8.2 Hz, 1H), 7.02 (dd, *J* = 8.1, 2.0 Hz, 1H), 6.90 (d, *J* = 2.0 Hz, 1H), 6.86 (s, 2H), 6.02 (s, 1H), 4.93 (t, *J* = 6.5 Hz, 1H), 3.10 (d, *J* = 5.9, 1.8 Hz, 2H), 2.96 – 2.81 (m, 3H), 2.36 – 2.31 (m, 1H), 2.29 (s, 3H), 2.19 (s, 3H), 2.07 (s, 6H), 1.85 – 1.74 (m, 4H), 1.61 (td, *J* = 11.8, 11.1, 3.7 Hz, 2H), 1.46 – 1.42 (m, 2H), 1.27 (s, 3H), 1.24 (d, *J* = 6.9 Hz, 6H), 1.06 (s, 3H); **13C NMR (150 MHz, Chloroform-*d*)** δ 161.0, 156.7, 155.5, 149.3, 147.0, 145.8, 134.6, 134.1, 131.1, 128.9, 128.1, 127.0, 124.5, 124.1, 100.7, 64.1, 54.8, 46.5, 38.5, 37.9, 37.8, 36.6, 33.6, 30.6, 29.6, 25.6, 24.1, 24.0, 21.0, 19.4, 19.0, 18.9, 16.8. **HRMS (ESI) m/z:** calcd.for C35H46IN2O+ [M + H]+: 637.2650; Found: 637.2643.

**2-(4-(*tert*-Butyl)phenoxy)-3-iodo-5-methylpyridin-4-amine (67)**

White solid (22 mg, 29%); **1H NMR (600 MHz, Chloroform-d)** δ 7.57 (d, J = 1.1 Hz, 1H), 7.41 – 7.35 (m, 2H), 7.06 – 7.00 (m, 2H), 4.82 (s, 2H), 2.13 (s, 3H), 1.31 (s, 9H); **13C NMR (151 MHz, Chloroform-d)** δ 161.6, 154.4, 152.3, 147.2, 145.8, 126.6, 120.2, 112.9, 68.1, 34.5, 31.6,14.7. **HRMS (ESI) m/z**: calcd. for C16H20IN2O+ [M + H]+: 383.0615; Found: 383.0612.

**10. NMR Spectra of Products**

**Supplementary Figure 7. 1H NMR**-spectrum (400 MHz, CDCl3) of **P1**

**Supplementary Figure 8.** 1**3C NMR**-spectrum **(**125 MHz, DMSO**)** of **P1**

**Supplementary Figure 9. 1H NMR**-spectrum (500 MHz, DMSO) of **P2**

**Supplementary Figure 10.** 1**3C NMR**-spectrum **(**125 MHz, DMSO**)** of **P2**

**Supplementary Figure 11. 1H NMR**-spectrum (400 MHz, CDCl3) of **P3**

**Supplementary Figure 12. 13C NMR**-spectrum **(**100 MHz, CDCl3**)** of **P3**

**Supplementary Figure 13. 1H NMR**-spectrum (600 MHz, DMSO) of **P4**

**Supplementary Figure 14. 13C NMR**-spectrum **(**150 MHz, DMSO**)** of **P4**

**Supplementary Figure 15. 1H NMR**-spectrum (500 MHz, DMSO) of **P5**

**Supplementary Figure 16. 13C NMR**-spectrum **(**125 MHz, DMSO**)** of **P5**

**Supplementary Figure 17. 1H NMR**-spectrum (600 MHz, CDCl3) of **P6**

**Supplementary Figure 18. 13C NMR**-spectrum **(**150 MHz, CDCl3**)** of **P6**

**Supplementary Figure 19. 1H NMR**-spectrum (400 MHz, CDCl3) of **P7**

**Supplementary Figure 20. 13C NMR**-spectrum **(**100 MHz, CDCl3**)** of **P7**

**Supplementary Figure 21. 1H NMR**-spectrum (400 MHz, CD3OD) of **2q**

**Supplementary Figure 22. 13C NMR**-spectrum **(**150 MHz, CD3OD**)** of **2q**

**Supplementary Figure 23. 1H NMR**-spectrum (500 MHz, DMSO) of **2r**

**Supplementary Figure 24. 13C NMR**-spectrum (125 MHz, DMSO) of **2r**

**Supplementary Figure 25. 1H NMR**-spectrum (600 MHz, CDCl3) of **58-1**

**Supplementary Figure 26. 13C NMR**-spectrum **(**150 MHz, CDCl3**)** of **58-1**

**Supplementary Figure 27. 1H NMR**-spectrum (600 MHz, CDCl3) of **63-1**

**Supplementary Figure 28. 13C NMR**-spectrum **(**150 MHz, CDCl3**)** of **63-1**

**Supplementary Figure 29. 1H NMR**-spectrum (600 MHz, Methanol) of **3**

**Supplementary Figure 30. 13C NMR**-spectrum **(**100 MHz, Methanol**)** of **3**

**Supplementary Figure 31. 1H NMR**-spectrum (400 MHz, DMSO) of **4**

**Supplementary Figure 32. 13C NMR**-spectrum **(**100 MHz, DMSO**)** of **4**

**Supplementary Figure 33. 1H NMR**-spectrum (400 MHz, CDCl3) of **5**

**
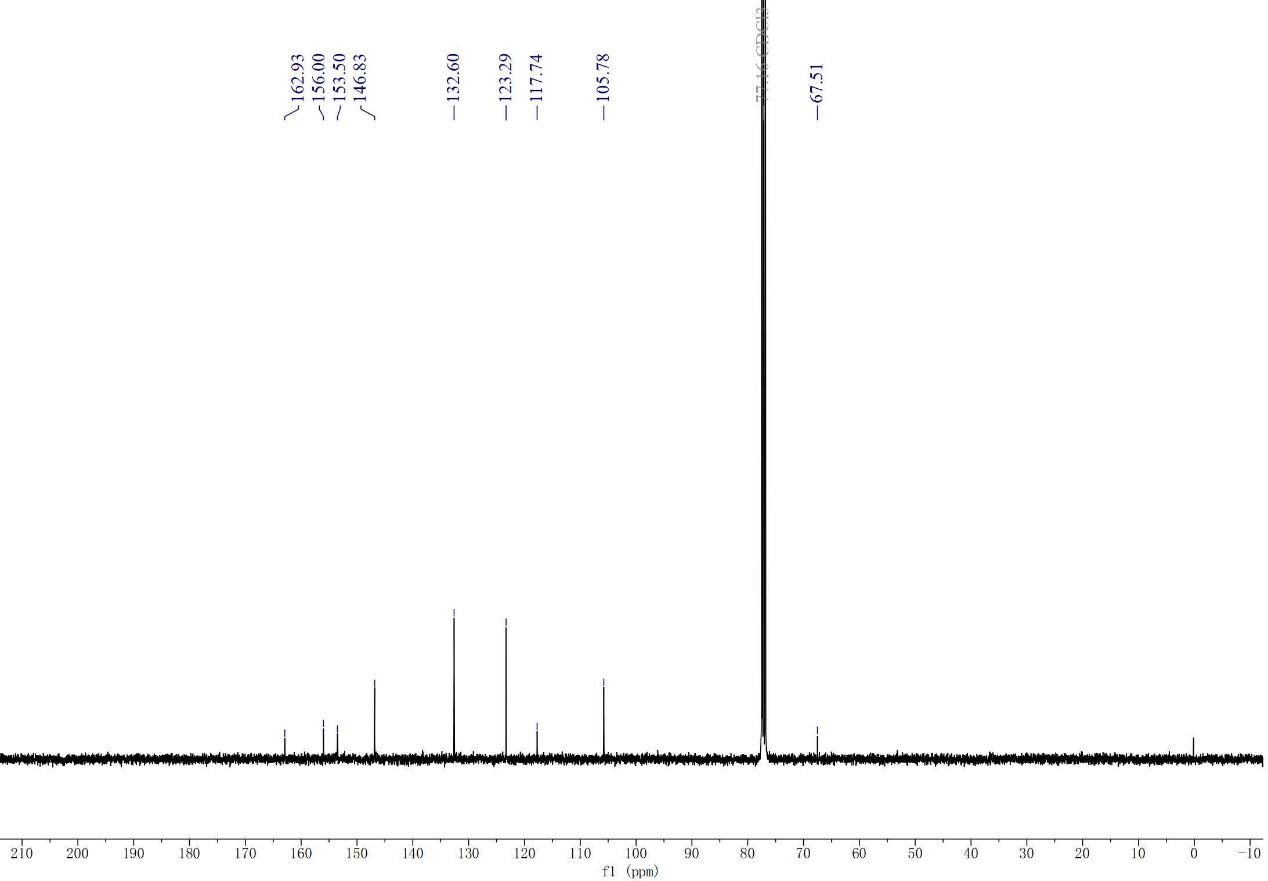
**

**Supplementary Figure 34. 13C NMR**-spectrum **(**150 MHz, CDCl3**)** of **5**

**Supplementary Figure 35. 1H NMR**-spectrum (600 MHz, CDCl3) of **6**

**Supplementary Figure 36. 13C NMR**-spectrum **(**125 MHz, CDCl3**)** of **6**

**Supplementary Figure 37. 1H NMR**-spectrum (400 MHz, CDCl3) of **7**

**Supplementary Figure 38. 13C NMR**-spectrum **(**150 MHz, CDCl3**)** of **7**

**Supplementary Figure 39. 1H NMR**-spectrum (500 MHz, CDCl3) of **8**

**Supplementary Figure 40. 13C NMR**-spectrum **(**125 MHz, CDCl3**)** of **8**

**Supplementary Figure 41. 1H NMR**-spectrum (400 MHz, CDCl3) of **9**

**Supplementary Figure 42.** 1**3C NMR**-spectrum **(**150 MHz, CDCl3**)** of **9**

**Supplementary Figure 43. 1H NMR**-spectrum (600 MHz, CDCl3) of **10**

**Supplementary Figure 44.** 1**3C NMR**-spectrum **(**150 MHz, CDCl3**)** of **10**

**Supplementary Figure 45. 1H NMR**-spectrum (600 MHz, CDCl3) of **11**

**Supplementary Figure 46.** 1**3C NMR**-spectrum **(**150 MHz, CDCl3**)** of **11**

**Supplementary Figure 47. 1H NMR**-spectrum (500 MHz, CDCl3) of **12**

**Supplementary Figure 48. 13C NMR**-spectrum **(**150 MHz, CDCl3**)** of **12**

**Supplementary Figure 49. 1H NMR**-spectrum (400 MHz, CDCl3) of **13**

**Supplementary Figure 50.** 1**3C NMR**-spectrum **(**100 MHz, CDCl3**)** of **13**

**Supplementary Figure 51. 1H NMR**-spectrum (400 MHz, CDCl3) of **14**

**Supplementary Figure 52.** 1**3C NMR**-spectrum **(**100 MHz, CDCl3**)** of **14**

**Supplementary Figure 53. 1H NMR**-spectrum (600 MHz, CDCl3) of **15**

**Supplementary Figure 54.** 1**3C NMR**-spectrum **(**150 MHz, CDCl3**)** of **15**

**Supplementary Figure 55. 1H NMR**-spectrum (600 MHz, CDCl3) of **16**

**Supplementary Figure 56.** 1**3C NMR**-spectrum **(**150 MHz, CDCl3**)** of **16**

**Supplementary Figure 57. 1H NMR**-spectrum (600 MHz, CDCl3) of **17**

**Supplementary Figure 58. 13C NMR**-spectrum **(**150 MHz, CDCl3**)** of **17**

**Supplementary Figure 59. 1H NMR**-spectrum (600 MHz, CDCl3) of **18**

**Supplementary Figure 60.** 1**3C NMR**-spectrum **(**150 MHz, CDCl3**)** of **18**

**Supplementary Figure 61. 1H NMR**-spectrum (600 MHz, CDCl3) of **19**

**Supplementary Figure 62. 13C NMR**-spectrum **(**150 MHz, CDCl3**)** of **19**

**Supplementary Figure 63. 1H NMR**-spectrum (600 MHz, CDCl3) of **20**

**Supplementary Figure 64.** 1**3C NMR**-spectrum **(**150 MHz, CDCl3**)** of **20**

**Supplementary Figure 65. 1H NMR**-spectrum (600 MHz, CDCl3) of **21**

**Supplementary Figure 66.** 1**3C NMR**-spectrum **(**150 MHz, CDCl3**)** of **21**

**Supplementary Figure 67. 1H NMR**-spectrum (400 MHz, CDCl3) of **22**

**Supplementary Figure 68. 13C NMR**-spectrum **(**100 MHz, CDCl3**)** of **22**

**Supplementary Figure 69. 1H NMR**-spectrum (500 MHz, CDCl3) of **23**

**Supplementary Figure 70.** 1**3C NMR**-spectrum **(**125 MHz, CDCl3**)** of **23**

**Supplementary Figure 71. 1H NMR**-spectrum (400 MHz, CDCl3) of **24**

**Supplementary Figure 72.** 1**3C NMR**-spectrum **(**150 MHz, CDCl3**)** of **24**

**Supplementary Figure 73. 1H NMR**-spectrum (400 MHz, CDCl3) of **25**

**Supplementary Figure 74. 13C NMR**-spectrum **(**100 MHz, CDCl3**)** of **25**

**Supplementary Figure 75. 1H NMR**-spectrum (400 MHz, CDCl3) of **26**

**Supplementary Figure 76.** 1**3C NMR**-spectrum **(**100 MHz, CDCl3**)** of **26**

**Supplementary Figure 77. 1H NMR**-spectrum (600 MHz, CDCl3) of **27**

**Supplementary Figure 78.** 1**3C NMR**-spectrum **(**150 MHz, CDCl3**)** of **27**

**Supplementary Figure 79. 1H NMR**-spectrum (400 MHz, CDCl3) of **28**

**Supplementary Figure 80.** 1**3C NMR**-spectrum **(**100 MHz, CDCl3**)** of **28**

**Supplementary Figure 81. 1H NMR**-spectrum (600 MHz, CDCl3) of **29**

**Supplementary Figure 82.** 1**3C NMR**-spectrum **(**150 MHz, CDCl3**)** of **29**

**Supplementary Figure 83. 1H NMR**-spectrum (600 MHz, CDCl3) of **30**

**Supplementary Figure 84. 13C NMR**-spectrum **(**150 MHz, CDCl3**)** of **30**

**Supplementary Figure 85. 1H NMR**-spectrum (600 MHz, CDCl3) of **31**

**Supplementary Figure 86.** **13C NMR**-spectrum **(**150 MHz, CDCl3**)** of **31**

**Supplementary Figure 87. 1H NMR**-spectrum (600 MHz, CDCl3) of **32**

**Supplementary Figure 88.** 1**3C NMR**-spectrum **(**150 MHz, CDCl3**)** of **32**

**Supplementary Figure 89. 1H NMR**-spectrum (500 MHz, CDCl3) of **33**

**Supplementary Figure 90.** 1**3C NMR**-spectrum **(**125 MHz, CDCl3**)** of **33**

**Supplementary Figure 91. 1H NMR**-spectrum (600 MHz, CDCl3) of **34**

**Supplementary Figure 92. 13C NMR**-spectrum **(**150 MHz, CDCl3**)** of **34**

**Supplementary Figure 93. 1H NMR**-spectrum (600 MHz, CDCl3) of **35**

**Supplementary Figure 94. 13C NMR**-spectrum **(**150 MHz, CDCl3**)** of **35**

**Supplementary Figure 95. 1H NMR**-spectrum (600 MHz, CDCl3) of **36**

**Supplementary Figure 96. 13C NMR**-spectrum **(**150 MHz, CDCl3**)** of **36**

**Supplementary Figure 97. 1H NMR**-spectrum (400 MHz, CDCl3) of **37**

**Supplementary Figure 98. 13C NMR**-spectrum **(**100 MHz, CDCl3**)** of **37**

**Supplementary Figure 99. 1H NMR**-spectrum (600 MHz, CDCl3) of **38**

**Supplementary Figure 100. 13C NMR**-spectrum **(**150 MHz, CDCl3**)** of **38**

**Supplementary Figure 101. 1H NMR**-spectrum (400 MHz, CDCl3) of **39**

**Supplementary Figure 102. 13C NMR**-spectrum **(**100 MHz, CDCl3**)** of **39**

**Supplementary Figure 103. 1H NMR**-spectrum (600 MHz, CDCl3) of **40**

**Supplementary Figure 104. 13C NMR**-spectrum **(**150 MHz, CDCl3**)** of **40**

**Supplementary Figure 105. 1H NMR**-spectrum (400 MHz, CDCl3) of **41**

**Supplementary Figure 106.** 13**C NMR**-spectrum **(**100 MHz, CDCl3**)** of **41**

**Supplementary Figure 107. 1H NMR**-spectrum (400 MHz, CDCl3) of **42**

**Supplementary Figure 108. 13C NMR**-spectrum **(**100 MHz, CDCl3**)** of **42**

**Supplementary Figure 109. 1H NMR**-spectrum (600 MHz, CDCl3) of **43**

**Supplementary Figure 110. 13C NMR**-spectrum **(**150 MHz, CDCl3**)** of **43**

**Supplementary Figure 111. 1H NMR**-spectrum (600 MHz, CDCl3) of **44**

**Supplementary Figure 112.** 1**3C NMR**-spectrum **(**150 MHz, CDCl3**)** of **44**

**Supplementary Figure 113. 1H NMR**-spectrum (600 MHz, CDCl3) of **45**

**Supplementary Figure 114.** 1**3C NMR**-spectrum **(**150 MHz, CDCl3**)** of **45**

**Supplementary Figure 115. 1H NMR**-spectrum (600 MHz, CDCl3) of **46**

**Supplementary Figure 116.** 1**3C NMR**-spectrum **(**150 MHz, CDCl3**)** of **46**

**Supplementary Figure 117. 1H NMR**-spectrum (600 MHz, CDCl3) of **47**

**Supplementary Figure 118. 13C NMR**-spectrum **(**150 MHz, CDCl3**)** of **47**

**Supplementary Figure 119. 1H NMR**-spectrum (400 MHz, CDCl3) of **48**

**Supplementary Figure 120. 13C NMR**-spectrum **(**125 MHz, CDCl3**)** of **48**

**Supplementary Figure 121. 1H NMR**-spectrum (400 MHz, CDCl3) of **49**

**Supplementary Figure 122.** 1**3C NMR**-spectrum **(**100 MHz, CDCl3**)** of **49**

**Supplementary Figure 123. 1H NMR**-spectrum (600 MHz, CDCl3) of **50**

**Supplementary Figure 124.** 1**3C NMR**-spectrum **(**150 MHz, CDCl3**)** of **50**

**Supplementary Figure 125. 1H NMR**-spectrum (600 MHz, DMSO) of **51**

**Supplementary Figure 126.** 1**3C NMR**-spectrum **(**125 MHz, DMSO**)** of **51**

**Supplementary Figure 127. 1H NMR**-spectrum (600 MHz, CDCl3) of **52**

**Supplementary Figure 128.** 1**3C NMR**-spectrum **(**150 MHz, CDCl3**)** of **52**

**Supplementary Figure 129. 1H NMR**-spectrum (400 MHz, CDCl3) of **53**

**Supplementary Figure 130. 13C NMR**-spectrum **(**100 MHz, CDCl3**)** of **53**

**Supplementary Figure 131. 1H NMR**-spectrum (600 MHz, CDCl3) of **54**

**Supplementary Figure 132. 13C NMR**-spectrum **(**150 MHz, CDCl3**)** of **54**

**Supplementary Figure 133. 1H NMR**-spectrum (600 MHz, DMSO) of **55**

**Supplementary Figure 134. 13C NMR**-spectrum **(**150 MHz, DMSO**)** of **55**

**Supplementary Figure 135. 1H NMR**-spectrum (600 MHz, DMSO) of **58**

**Supplementary Figure 136. 13C NMR**-spectrum **(**150 MHz, DMSO**)** of **58**

**Supplementary Figure 137. 1H NMR**-spectrum (600 MHz, CDCl3) of **63**

**Supplementary Figure 138. 13C NMR**-spectrum **(**150 MHz, CDCl3**)** of **63**

**Supplementary Figure 139. 1H NMR**-spectrum (600 MHz, CDCl3) of **67**

**Supplementary Figure 140. 13C NMR**-spectrum **(**150 MHz, CDCl3**)** of **67**

**11. Supplementary References**

1. Chauhan, J.; Yoshioka, M.; Pogash, S.; Strovel, J. W.; Fletcher, S. Discovery and anti-tumor activity of 4-(benzylamino)-6-(3,5-dimethylisoxazol-4-yl)quinolin-2(1H)-one (CG13250), a potent, selective and orally bioavailable BET bromodomain inhibitor. *Bioorg. Med. Chem. Lett.* **2023**, *86*, 129220.
2. Mezentseva, M. V.; Faermark, I. F.; Kuleshova, E. F.; Anisimova, O. S.; Shvarts, G. Y.; Granik, V. G.; Mashkovskii, M. D. Synthesis and pharmacological activity of derivatives of 3-cyano-4(6)-methyl-6(4)-dimethylaminopyridine. *Pharm. Chem. J.* **1991**, *25*, 623–628.
3. (a) Merritt, EA.; Carneiro, VMT.; Jr. Silva LF.; Olofsson, B. Facile Synthesis of Koser’s Reagent and Derivatives from Iodine or Aryl Iodides. *J. Org. Chem*. **2010,** *75*, 7416–7419. (b) Linde, E.; Mondal, S.; Olofsson, B. Advancements in the Synthesis of Diaryliodonium Salts: Updated Protocols. *Adv. Synth. Catal.* **2023,** *365*, 2751–2756.
4. Appa, RM.; Naidu, BR.; Lakshmidevi, J.;Vantikommu, J.; Venkateswarlu, K. Added catalyst-free, versatile and environment beneficial bromination of (hetero) aromatics using NBS in WEPA. *SN Appl. Sci.*, **2019**, *1*, 1281.
5. Hanan, E. J.; *et al*. Discovery of Selective and Noncovalent Diaminopyrimidine-Based Inhibitors of Epidermal Growth Factor Receptor Containing the T790M Resistance Mutation. *J. Med. Chem.* **2014**, *57*, 10176–10191.
6. Vajpayee, V.; Moon, M. E.; Lee, S.; Ravikumar, S.; Kim, H.; Ahn, B.; Choi, S.; Hong, S. H.; Chi, K. Halogenation and DNA cleavage via thermally stable arenediazonium camphor -sulfonate salts. *Tetrahedron* **2013**, *69*, 3511–3517.
7. (a) Wang, W.; Lu, J.; Bai, H.; Fu, Y.; Cheng, L.; Zhu, C.; Li, Y.; Wu, X. Gold/Chiral Amine Relay Catalysis Enables Asymmetric Synthesis of C2-Quaternary Indolin-3-ones. *Org. Lett.* **2024**, *26*, 1792–1796. (b) Lu, B.; Luo, Y.; Liu, L.; Ye, L.; Wang, Y.; Zhang, L. Umpolung Reactivity of Indole through Gold Catalysis. *Angew. Chem. Int. Ed*, **2011**, *50*, 8358–8362.
8. Hogan, P. J.; Cox, B. G. Aqueous Process Chemistry: The Preparation of Aryl Sulfonyl Chlorides. *Org. Process Res. Dev*. **2009**, *13*, 875–879.
9. Wen, T.; Zhang, Z.; Ye, L.; Zhang, C.; Jin, B.; Wang, W.; Chen, Z.; Cai, H. Metal-free heteroarene C(sp2)–H amination with unprotected (hetero)arylamines. *Org. Chem. Front.* **2023**, *10*, 3045–3051.
10. Pan, Y.; Wu, Y.; Chen, Z.; Hao, W.; Li, G.; Tu, S.; Jiang, B. Synthesis of 3-Iminoindol-2-amines and Cyclic Enaminones via Palladium-Catalyzed Isocyanide Insertion-Cyclization. *J. Org. Chem.* **2015**, *80,* 5764–5770.
11. Zhang, Z.; Deng, J.-T.; Feng, J.-Y.; Liang, J.-Y.; Xu, X.-T.; Peng, J.-B. Palladium Catalyzed Annulation of *o*-Iodo-Anilines with Propargyl Alcohols: Synthesis of Substituted Quinolines, *J. Org. Chem.* **2023**, *88*, 12054–12063.
12. Schroeder, G. M.; *et al*. Discovery of *N*-(4-(2-Amino-3-chloropyridin-4-yloxy)-3-fluorophenyl)-4-ethoxy-1-(4-fluorophenyl)-2-oxo-1,2-dihydropyridine-3-carboxamide (BMS-777607), a Selective and Orally Efficacious Inhibitor of the Met Kinase Superfamily, *J. Med. Chem.* **2009**, *52*, 1251–1254.
13. Liang, H.; Zhu, G.; Pu, X.; Qiu, L. Copper-Catalyzed Enantioselective C–H Arylation between 2-Arylindoles and Hypervalent Iodine Reagents. *Org. Lett.* **2021**, *23*, 9246–9250.
14. Mayasundari, A.; Fujii, N. Efficient formation of 4,6-disubstituted pyrrolo[2,3-*d*]pyrimidines: a novel route to TWS119, a glycogen synthase kinase-3β inhibitor, *Tetrahedron Lett.* **2010**, *51*, 3597–3598.
15. (a) Firouzabadi, H.; Iranpoor, N.; Gholinejad, M.; Akbari, S.; Jeddi, N. Palladium nanoparticles supported on agarose-functionalized magnetic nanoparticles of Fe3O4 as a recyclable catalyst for C–C bond formation via Suzuki–Miyaura, Heck–Mizoroki and Sonoga-shira-Hagihara coupling reactions. *RSC Adv*. **2014**, *4*, 17060-17070. (b) Gerbino, DC.; Mandolesi, SD.; Schmalz, H.; Podesta, JC. Introduction of Allyl and Prenyl Side-Chains into Aromatic Systems by Suzuki Cross-Coupling Reactions. *Eur. J. Org. Chem.* **2009**, *2009*, 3964-3972.
16. Chen, Y. L.; Obach, R. S.; Braselton, J.; Corman, M. L.; Forman, J.; Freeman, J.; Gallaschun, R. J.; Mansbach, R.; Schmidt, A. W.; Sprouse, J. S.; Tingley III, F. D.; Winston, E.; Schulz, D. W. 2-Aryloxy-4-alkylaminopyridines: Discovery of Novel Corticotropin-Releasing Factor 1 Antagonists, *J. Med. Chem.* **2008**, *51*, 1385–1392.
17. (a) Hariharan, P. C.; Pople, J. A. Accuracy of AH Nequilibrium Geometries by Single Determinant Molecular Orbital Theory. *Molecular Physics* **1974**, *27*, 209–214. (b) Petersson, G. A.; Bennett, A.; Tensfeldt, T. G.; Laham, Al, M. A.; Shirley, W. A.; Mantzaris, J. A Complete Basis Set Model Chemistry. I. the Total Energies of Closed‐Shell Atoms and Hydrides of the First‐Row Elements. *J. Chem. Phys.* **1988**, *89*, 2193–2218. (c) Grimme, S.; Antony, J.; Ehrlich, S.; Krieg, H. A Consistent and Accurate Ab Initio Parametrization of Density Functional Dispersion Correction (DFT-D) for the 94 Elements H-Pu. *J. Chem. Phys.* **2010**, *132*, 154104.
18. Grimme, S.; Ehrlich, S.; Goerigk, L. Effect of the Damping Function in Dispersion Corrected Density Functional Theory. *J. Comput. Chem.* **2011**, *32*, 1456–1465.
19. A. Schaefer, H. Horn, R. Ahlrichs. Fully optimized contracted Gaussian-basis sets for atoms Li to K. *J. Chem. Phys.* **1992**, *97*, 2571–2577.
20. A. Schaefer, C. Huber, R. Ahlrichs. Fully optimized contracted Gaussian-basis sets of triple zeta valence quality for atoms Li to Kr. *J. Chem. Phys.* **1994**, *100*, 5829–5835.
21. F. Weigend, R. Ahlrichs. Balanced basis sets of split valence, triple zeta valence and quadruple zeta valence quality for H to Rn: Design and assessment of accurac. *Phys. Chem. Chem. Phys.* **2005**, *7*, 3297–3305.
22. F. Weigend. Accurate Coulomb-fitting basis sets for H to Rn. *Phys. Chem. Chem. Phys.* **2006**, *8*, 1057–1065.
23. Gaussian 16, Revision B.01, Frisch, M. J.; Trucks, G. W.; Schlegel, H. B.; Scuseria, G. E.; Robb, M. A.; Cheeseman, J. R.; Scalmani, G.; Barone, V.; Mennucci, B.; Petersson, G. A.; Nakatsuji, H.; Caricato, M.; Li, X.; Hratchian, H. P.; Izmaylov, A. F.; Bloino, J.; Zheng, G.; Sonnenberg, J. L.; Hada, M.; Ehara, M.; Toyota, K.; Fukuda, R.; Hasegawa, J.; Ishida, M.; Nakajima, T.; Honda, Y.; Kitao, O.; Nakai, H.; Vreven, T.; Montgomery, J. A., Jr.; Peralta, J. E.; Ogliaro, F.; Bearpark, M.; Heyd, J. J.; Brothers, E.; Kudin, K. N.; Staroverov, V. N.; Kobayashi, R.; Normand, J.; Raghavachari, K.; Rendell, A.; Burant, J. C.; Iyengar, S. S.; Tomasi, J.; Cossi, M.; Rega, N.; Millam, J. M.; Klene, M.; Knox, J. E.; Cross, J. B.; Bakken, V.; Adamo, C.; Jaramillo, J.; Gomperts, R.; Stratmann, R. E.; Yazyev, O.; Austin, A. J.; Cammi, R.; Pomelli, C.; Ochterski, J. W.; Martin, R. L.; Morokuma, K.; Zakrzewski, V. G.; Voth, G. A.; Salvador, P.; Dannenberg, J. J.; Dapprich, S.; Daniels, A. D.; Farkas, Ö.; Foresman, J. B.; Ortiz, J. V.; Cioslowski, J.; Fox, D. J. Gaussian, Inc., Wallingford CT, 2016.
24. Y. Zhao, D. G. Truhlar. The M06 suite of density functionals for main group thermochemistry, thermochemical kinetics, noncovalent interactions, excited states, and transition elements: two new functionals and systematic testing of four M06-class functionals and 12 other functionals. *Theor. Chem. Acc.* **2008**, *120*, 215–241.
25. A. Schaefer, C. Huber, R. Ahlrichs. “Fully optimized contracted Gaussian-basis sets of triple zeta valence quality for atoms Li to Kr”. *J. Chem. Phys.* **1994**, *100*, 5829–5835.
26. M. F. Iozzi, B. Mennucci, J. Tomasi, R. Cammi. Excitation energy transfer (EET) between molecules in condensed matter: A novel application of the polarizable continuum model (PCM). *J. Chem. Phys.* **2004**, *120*, 7029.
27. A. V. Marenich, C. J. Cramer, D. G. Truhlar, Universal solvation model based on solute electron density and on a continuum model of the solvent defined by the bulk dielectric constant and atomic surface tensions. *J. Phys. Chem. B.* **2009**, *113*, 6378–6396.
28. V. S. Bernales, A.V. Marenich, R. Contreras, C.J. Cramer, D. G. Truhlar, “Quantum mechanical continuum solvation models for ionic liquids” *J. Phys. Chem. B* **2012**, *116*, 9122–9129.
